# Supplementary material for: Structure elucidation of metabolite x17299 by interpretation of mass spectrometric data
Source: PubMed Central journal article supplement (PMC5486616; doi:10.1007/s11306-017-1231-x), 2017-06-24
Supplement: 11306_2017_1231_MOESM1_ESM.pdf [file 11306_2017_1231_MOESM1_ESM.pdf]

## Supplementary Material

### Structure Elucidation of Metabolite x17299 by Interpretation of Mass Spectrometric Data

Qibo Zhang,\* Lisa A. Ford, Anne M. Evans, Douglas R. Toal

Metabolon, Inc., 617 Davis Drive, Suite 400, Morrisville, NC 27560, USA

Corresponding author:

\*Tel: +1 (919) 595-2287. E-mail: qzhang@metabolon.com.

### Supporting Information Table of Contents

|                                                                                                                                                                       |      |
|-----------------------------------------------------------------------------------------------------------------------------------------------------------------------|------|
| <b>Figure S1.</b> LC/MS chromatogram and spectrum of x17299 (1.44 min) in a plasma extract with expansion (top).....                                                  | S-4  |
| <b>Figure S2.</b> MS <sup>4</sup> spectrum of m/z 229/142/114 of x17299. ....                                                                                         | S-4  |
| <b>Figure S3.</b> LC/MS chromatogram and spectrum of deuterated x17299 (1.57 min) with expansion (top).....                                                           | S-5  |
| <b>Figure S4.</b> MS <sup>3</sup> spectrum of m/z 230/143 of deuterated x17299 with expansion (top).....                                                              | S-6  |
| <b>Figure S5.</b> LC/MS chromatogram and spectrum of synthetic L,L-TMAP (1.44 min).....                                                                               | S-6  |
| <b>Figure S6.</b> LC-MS/MS chromatograms of x17299 (1.44 min) in a plasma extract (top), synthetic L,L-TMAP (1.44 min, middle), and their co-injection (bottom). .... | S-7  |
| <b>Figure S7.</b> MS <sup>2</sup> spectra of x17299 (left) and synthetic L,L-TMAP (right) with expansions (top and middle).....                                       | S-8  |
| <b>Figure S8.</b> MS <sup>3</sup> spectra of m/z 229/142 of x17299 (left) and synthetic L,L-TMAP (right) with expansion (top). ....                                   | S-9  |
| <b>Figure S9.</b> MS <sup>3</sup> spectra of m/z 229/170 of x17299 (left) and synthetic L,L-TMAP (right) with expansion (top). ....                                   | S-9  |
| <b>Figure S10.</b> MS <sup>4</sup> spectra of m/z 229/142/114 of synthetic L,L-TMAP (bottom) and x17299 (top) for comparison. ....                                    | S-10 |
| <b>Figure S11.</b> MS spectrum of deuterated synthetic L,L-TMAP with expansion (top). ....                                                                            | S-10 |
| <b>Figure S12.</b> MS <sup>2</sup> spectra of deuterated x17299 (left) and synthetic L,L-TMAP (right) with expansions (top and middle).....                           | S-11 |

|                                                                                                                                                                                        |      |
|----------------------------------------------------------------------------------------------------------------------------------------------------------------------------------------|------|
| <b>Figure S13.</b> MS <sup>3</sup> spectra of m/z 230/143 of deuterated x17299 (left) and synthetic L,L-TMAP (right) with expansion (top). .....                                       | S-11 |
| <b>Figure S14.</b> LC/MS chromatogram and spectrum of synthetic D-alanyl-L-proline (2.24 min). .....                                                                                   | S-12 |
| <b>Figure S15.</b> LC/MS chromatogram and spectrum of L-alanyl-L-proline (1.50 min) from TCI for comparison. ....                                                                      | S-12 |
| <b>Figure S16.</b> MS <sup>2</sup> spectrum of synthetic D-alanyl-L-proline with expansion (top). ....                                                                                 | S-13 |
| <b>Figure S17.</b> MS <sup>2</sup> spectrum of L-alanyl-L-proline from TCI with expansion (top) for comparison. ....                                                                   | S-13 |
| <b>Figure S18.</b> LC-MS/MS chromatograms of D-alanyl-L-proline (top, 2.25 min, synthesized), L-alanyl-L-proline (middle, 1.50 min, from TCI), and a mixture of the two (bottom). .... | S-14 |
| <b>Figure S19.</b> LC/MS chromatogram and spectrum of synthetic D,L-TMAP (2.37 min). ....                                                                                              | S-15 |
| <b>Figure S20.</b> MS <sup>2</sup> spectra of synthetic D,L-TMAP (left) and L,L-TMAP (right) with expansions (top and middle) for comparison. ....                                     | S-15 |
| <b>Figure S21.</b> MS <sup>3</sup> spectra of m/z 229/142 of synthetic D,L-TMAP (left) and L,L-TMAP (right) with expansion (top) for comparison. ....                                  | S-16 |
| <b>Figure S22.</b> MS <sup>3</sup> spectra of m/z 229/170 of synthetic D,L-TMAP (left) and L,L-TMAP (right) with expansion (top) for comparison. ....                                  | S-16 |
| <b>Figure S23.</b> LC-MS/MS chromatograms of x17299 (1.42 min) in a plasma extract (top), synthetic D,L-TMAP (2.36 min, middle), and their co-injection (bottom). ....                 | S-17 |
| <b>Figure S24.</b> LC/MS chromatogram and spectrum of synthetic D-alanyl-D-proline (1.50 min). ....                                                                                    | S-18 |
| <b>Figure S25.</b> MS <sup>2</sup> spectrum of synthetic D-alanyl-D-proline with expansion (top). ....                                                                                 | S-18 |
| <b>Figure S26.</b> LC/MS chromatogram and spectrum of synthetic D,D-TMAP (1.45 min). ....                                                                                              | S-19 |
| <b>Figure S27.</b> MS <sup>2</sup> spectra of synthetic D,D-TMAP (left) and L,L-TMAP (right) with expansions (top and middle) for comparison. ....                                     | S-20 |
| <b>Figure S28.</b> MS <sup>3</sup> spectra of m/z 229/142 of synthetic D,D-TMAP (left) and L,L-TMAP (right) with expansion (top) for comparison. ....                                  | S-20 |
| <b>Figure S29.</b> MS <sup>3</sup> spectra of m/z 229/170 of synthetic D,D-TMAP (left) and L,L-TMAP (right) with expansion (top) for comparison. ....                                  | S-21 |
| <b>Figure S30.</b> LC-MS/MS chromatograms of synthetic D,D-TMAP (1.41 min, top), L,L-TMAP (1.41 min, middle), and their co-injection (bottom). ....                                    | S-21 |
| <b>Figure S31.</b> LC-MS/MS chromatograms of synthetic D,D-TMAP (1.41 min, top), x17299 (1.41 min, middle) in a plasma extract, and their co-injection (bottom). ....                  | S-22 |
| <b>Figure S32.</b> LC/MS chromatograms and mass spectra of L,L-TMAP-L-Phe-OMe (1.78 min, left) and D,D-TMAP-L-Phe-OMe (2.01 min, right) with expansions (top). ....                    | S-23 |

|                                                                                                                                                                                                                                                                                                                                                    |      |
|----------------------------------------------------------------------------------------------------------------------------------------------------------------------------------------------------------------------------------------------------------------------------------------------------------------------------------------------------|------|
| <b>Figure S33.</b> MS <sup>2</sup> spectra of L,L-TMAP-L-Phe-OMe (middle), D,D-TMAP-L-Phe-OMe (bottom), and x17299-L-Phe-OMe (top).....                                                                                                                                                                                                            | S-24 |
| <b>Figure S34.</b> MS <sup>3</sup> spectra of m/z 390/331 (top), m/z 390/271 (middle), and m/z 390/243 (bottom) of L,L-TMAP-L-Phe-OMe (left) and D,D-TMAP-L-Phe-OMe (right).....                                                                                                                                                                   | S-25 |
| <b>Figure S35.</b> MS <sup>3</sup> spectra of m/z 390/303 (top), m/z 390/168 (middle), and m/z 390/142 (bottom) of L,L-TMAP-L-Phe-OMe (left) and D,D-TMAP-L-Phe-OMe (right).....                                                                                                                                                                   | S-26 |
| <b>Figure S36.</b> LC/MS chromatograms and mass spectrum of x17299-L-Phe-OMe (1.77 min) with expansion (top).....                                                                                                                                                                                                                                  | S-27 |
| <b>Figure S37.</b> MS <sup>3</sup> spectra of m/z 390/331 of x17299-L-Phe-OMe (top), L,L-TMAP-L-Phe-OMe (middle), and D,D-TMAP-L-Phe-OMe (bottom).....                                                                                                                                                                                             | S-28 |
| <b>Figure S38.</b> MS <sup>3</sup> spectra of m/z 390/271 of x17299-L-Phe-OMe (top), L,L-TMAP-L-Phe-OMe (middle), and D,D-TMAP-L-Phe-OMe (bottom).....                                                                                                                                                                                             | S-29 |
| <b>Figure S39.</b> MS <sup>3</sup> spectra of m/z 390/243 of x17299-L-Phe-OMe (top), L,L-TMAP-L-Phe-OMe (middle), and D,D-TMAP-L-Phe-OMe (bottom).....                                                                                                                                                                                             | S-30 |
| <b>Figure S40.</b> LC/MS chromatogram and MS spectrum (left), and MS <sup>2</sup> spectrum (right) of synthetic L,L-TMAP- <i>d</i> <sub>9</sub> (1.43 min) with expansions (middle and top).....                                                                                                                                                   | S-31 |
| <b>Figure S41.</b> LC/MS chromatograms of x17299 (1.45 min, left top) and L,L-TMAP- <i>d</i> <sub>9</sub> (1.44 min, left bottom) in a spiked plasma extract, and x17299-L-Phe-OMe (1.71 min, right top) and L,L-TMAP- <i>d</i> <sub>9</sub> -L-Phe-OMe (1.71 min, right bottom) in a coupling reaction mixture of the spiked plasma extract. .... | S-32 |
| <b>Figure S42.</b> MS (top) and MS <sup>2</sup> (bottom) spectra of L,L-TMAP- <i>d</i> <sub>9</sub> -L-Phe-OMe. ....                                                                                                                                                                                                                               | S-32 |
| <b>Scheme S1.</b> Proposed fragmentation pathways of TMAP-L-Phe-OMe. ....                                                                                                                                                                                                                                                                          | S-33 |
| <b>Table S1.</b> Spectrum list of MS <sup>2</sup> of x17299. ....                                                                                                                                                                                                                                                                                  | S-34 |
| <b>Table S2.</b> Spectrum list of MS <sup>2</sup> of deuterated x17299.....                                                                                                                                                                                                                                                                        | S-34 |
| <b>Table S3.</b> Spectrum list of MS <sup>2</sup> of synthetic L,L-TMAP.....                                                                                                                                                                                                                                                                       | S-35 |
| <b>Table S4.</b> Spectrum list of MS <sup>2</sup> of deuterated synthetic L,L-TMAP.....                                                                                                                                                                                                                                                            | S-35 |
| <b>Table S5.</b> Spectrum list of MS <sup>2</sup> of synthetic D,L-TMAP. ....                                                                                                                                                                                                                                                                      | S-36 |
| <b>Table S6.</b> Spectrum list of MS <sup>2</sup> of synthetic D,D-TMAP.....                                                                                                                                                                                                                                                                       | S-36 |
| <b>Table S7.</b> Spectrum list of MS <sup>2</sup> of L,L-TMAP-L-Phe-OMe.....                                                                                                                                                                                                                                                                       | S-37 |
| <b>Table S8.</b> Spectrum list of MS <sup>2</sup> of D,D-TMAP-L-Phe-OMe.....                                                                                                                                                                                                                                                                       | S-37 |
| <b>Table S9.</b> Spectrum list of MS <sup>2</sup> of x17299-L-Phe-OMe. ....                                                                                                                                                                                                                                                                        | S-38 |
| <b>Table S10.</b> Spectrum list of MS <sup>2</sup> of synthetic L,L-TMAP- <i>d</i> <sub>9</sub> .....                                                                                                                                                                                                                                              | S-38 |
| <b>Table S11.</b> Spectrum list of MS <sup>2</sup> of L,L-TMAP- <i>d</i> <sub>9</sub> -L-Phe-OMe. ....                                                                                                                                                                                                                                             | S-39 |

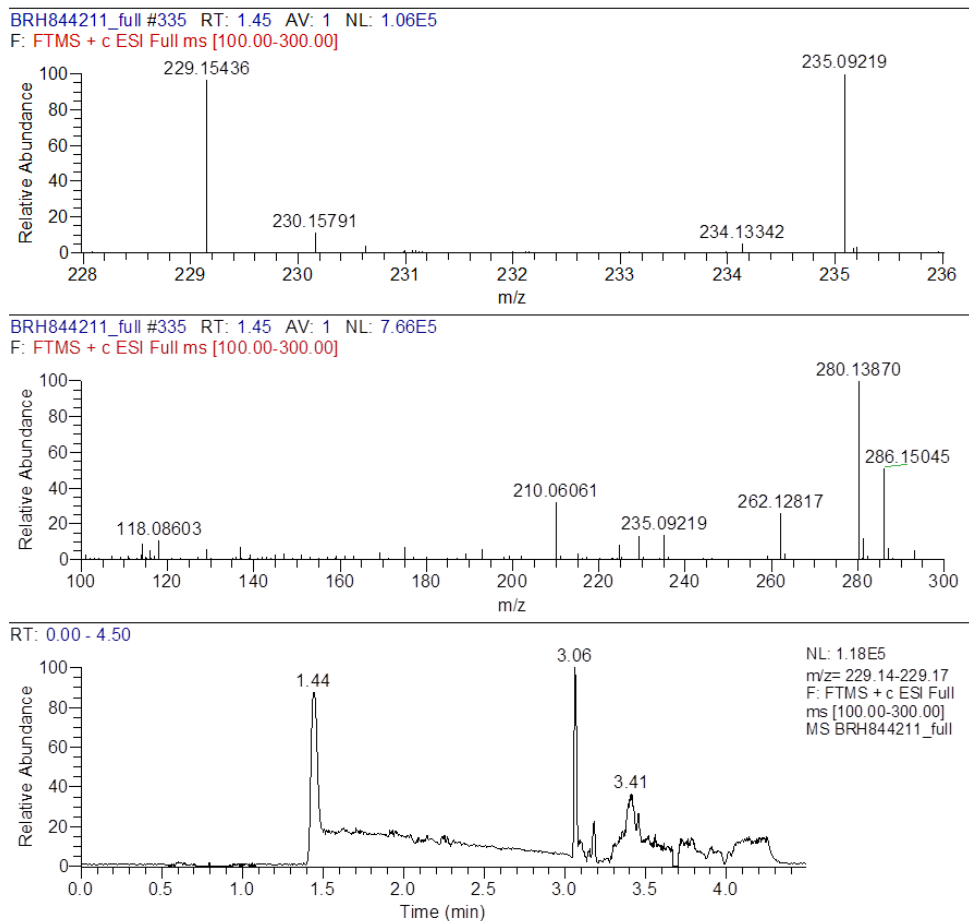

**Figure S1.** LC/MS chromatogram and spectrum of x17299 (1.44 min) in a plasma extract with expansion (top).

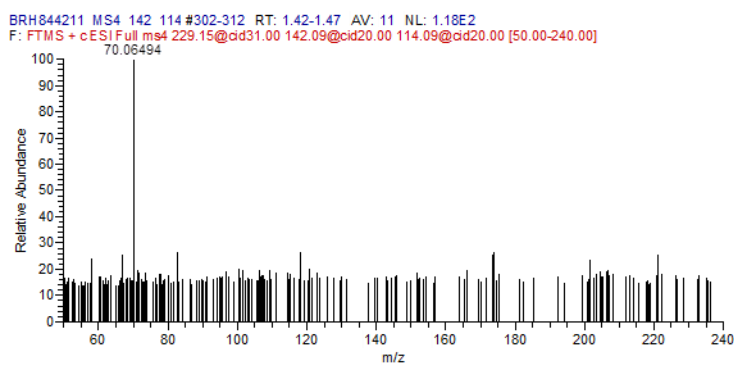

**Figure S2.** MS<sup>4</sup> spectrum of  $m/z$  229/142/114 of x17299.

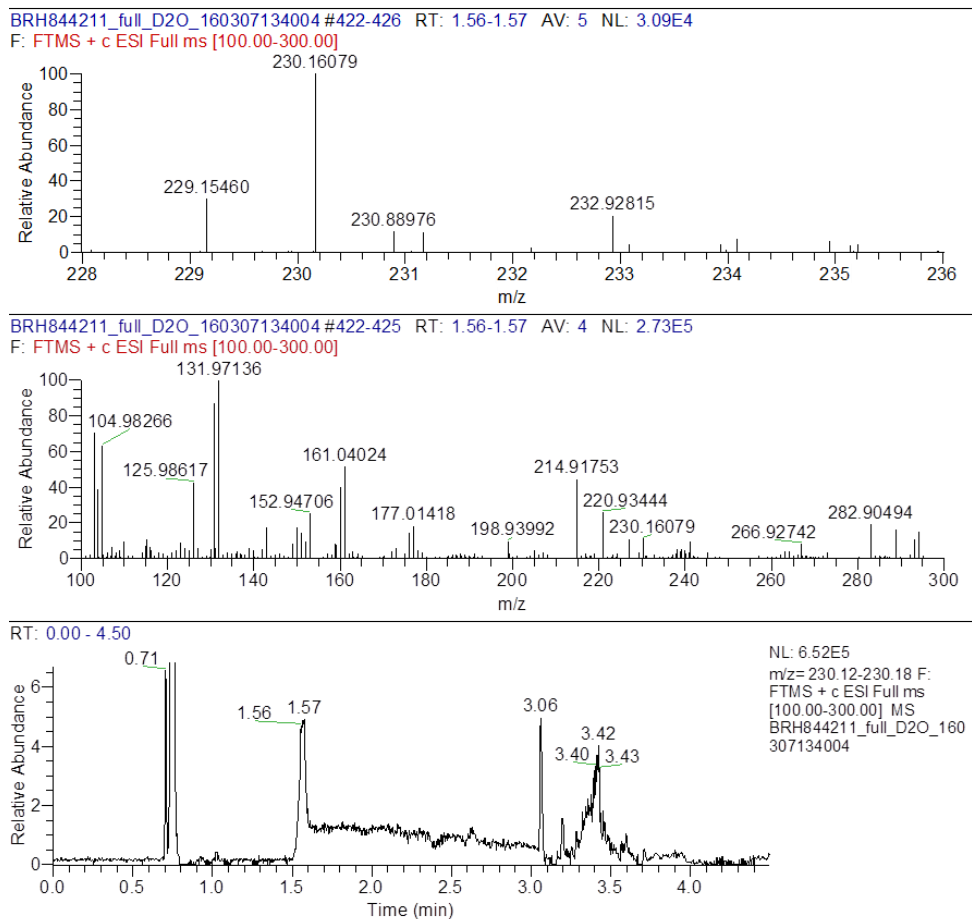

**Figure S3.** LC/MS chromatogram and spectrum of deuterated x17299 (1.57 min) with expansion (top).

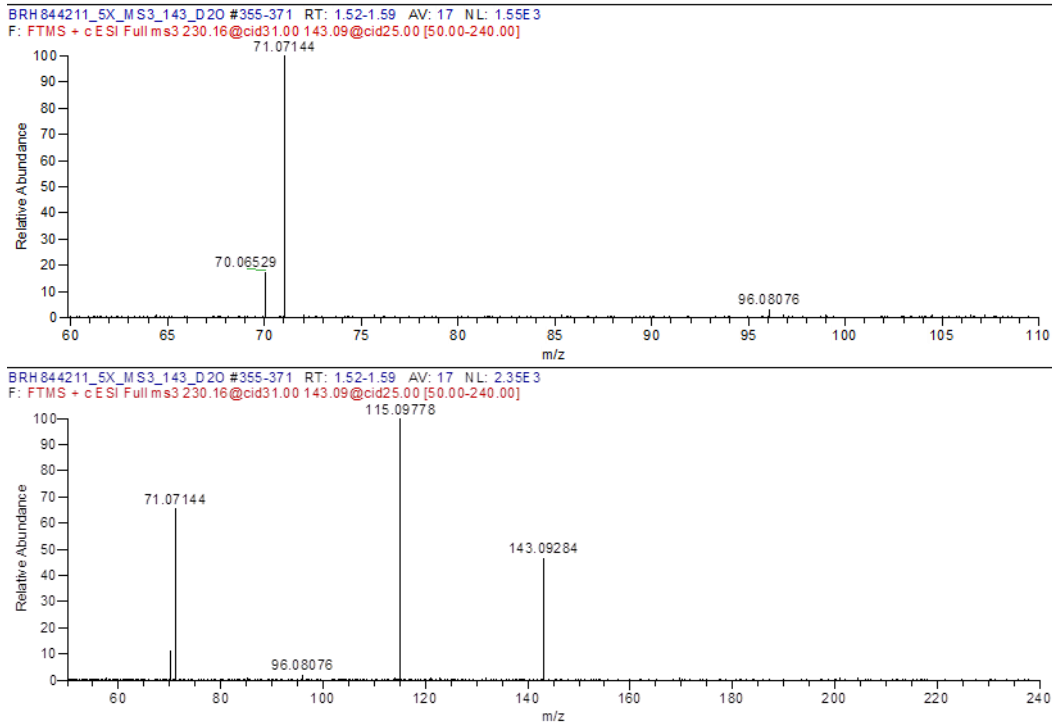

**Figure S4.** MS<sup>3</sup> spectrum of  $m/z$  230/143 of deuterated x17299 with expansion (top).

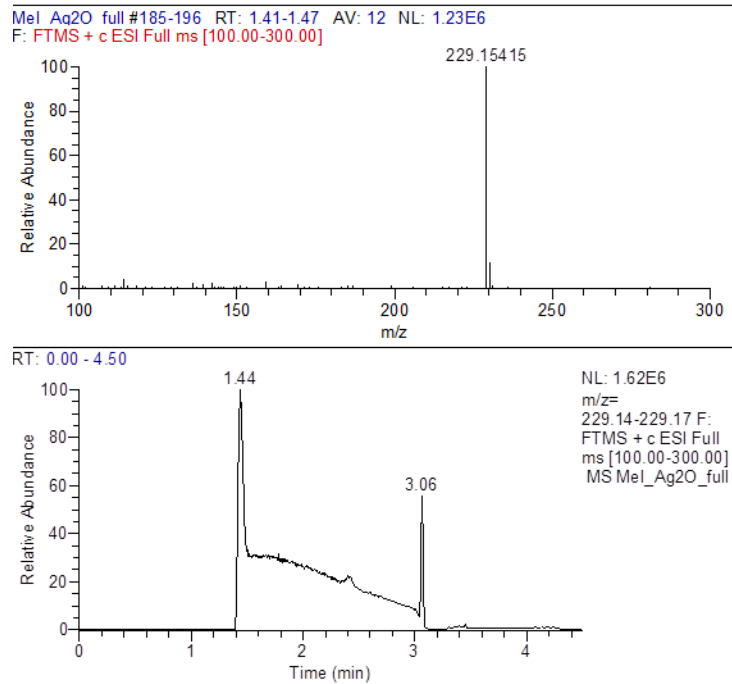

**Figure S5.** LC/MS chromatogram and spectrum of synthetic L,L-TMAP (1.44 min).

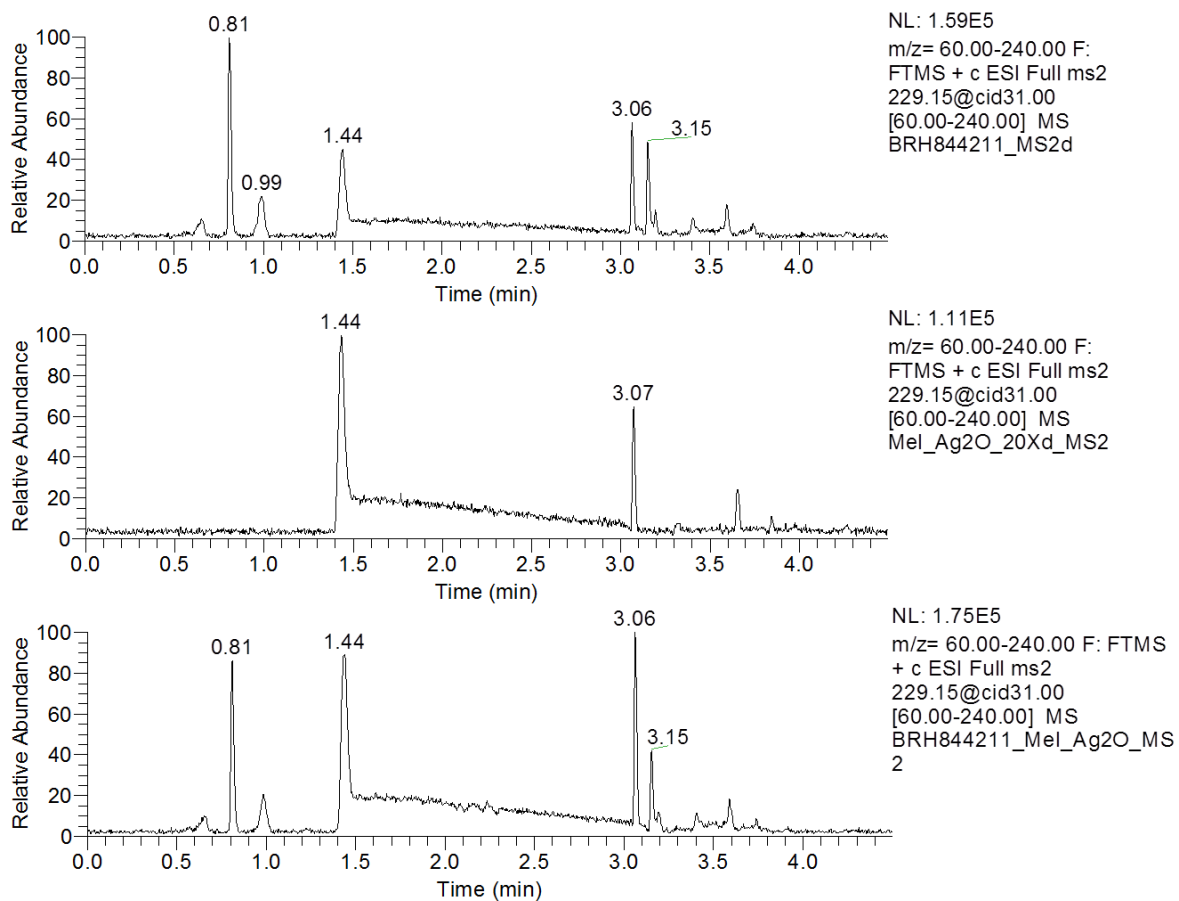

**Figure S6.** LC-MS/MS chromatograms of x17299 (1.44 min) in a plasma extract (top), synthetic L,L-TMAP (1.44 min, middle), and their co-injection (bottom).

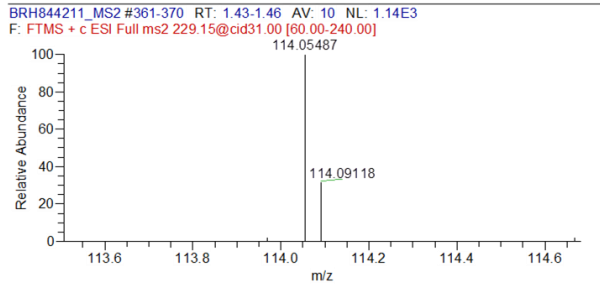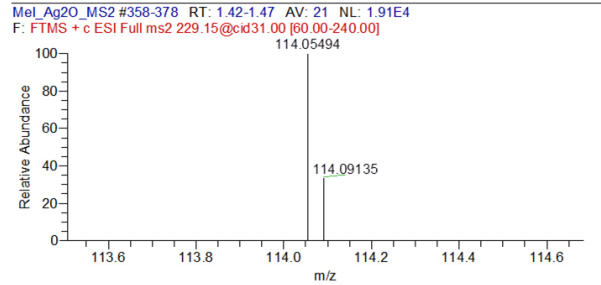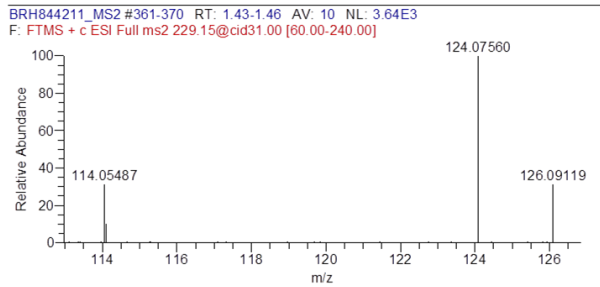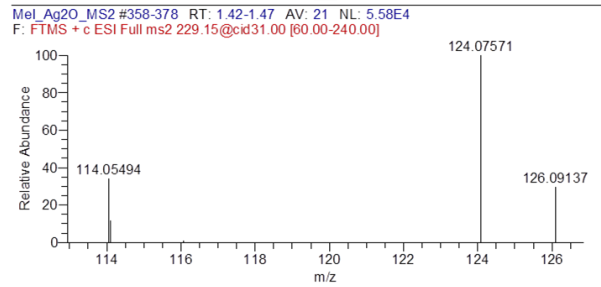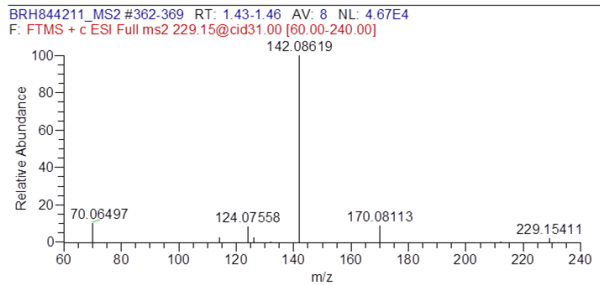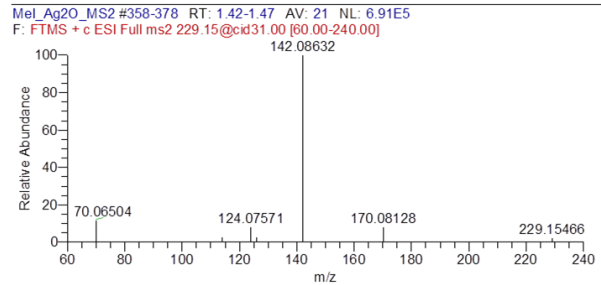

**Figure S7.** MS<sup>2</sup> spectra of x17299 (left) and synthetic L,L-TMAP (right) with expansions (top and middle).



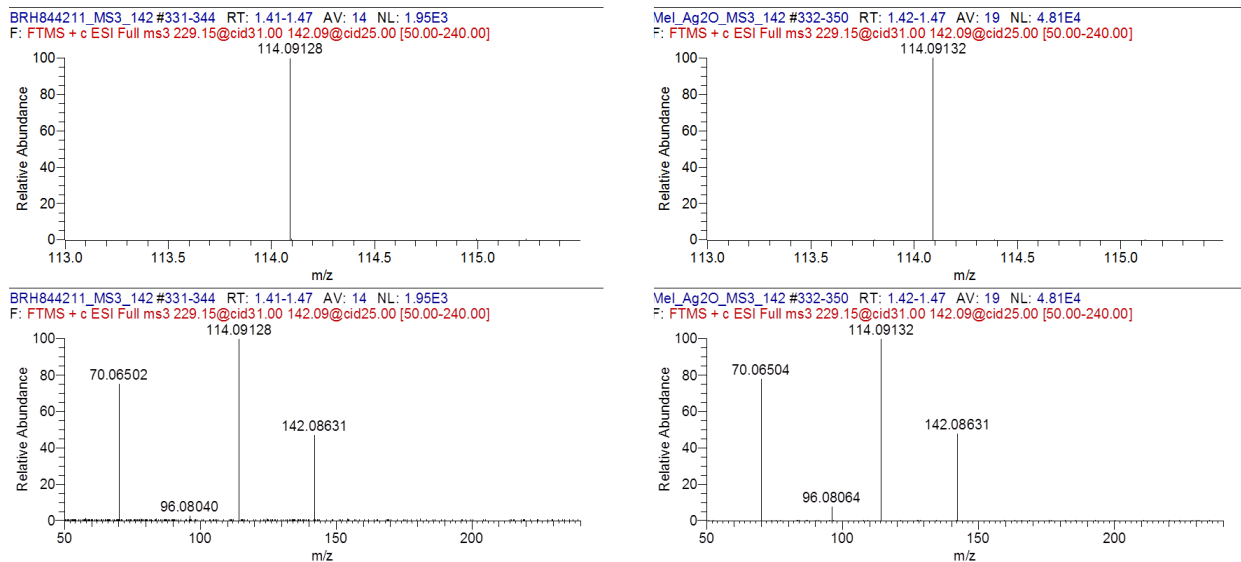

**Figure S8.** MS<sup>3</sup> spectra of  $m/z$  229/142 of x17299 (left) and synthetic L,L-TMAP (right) with expansion (top).

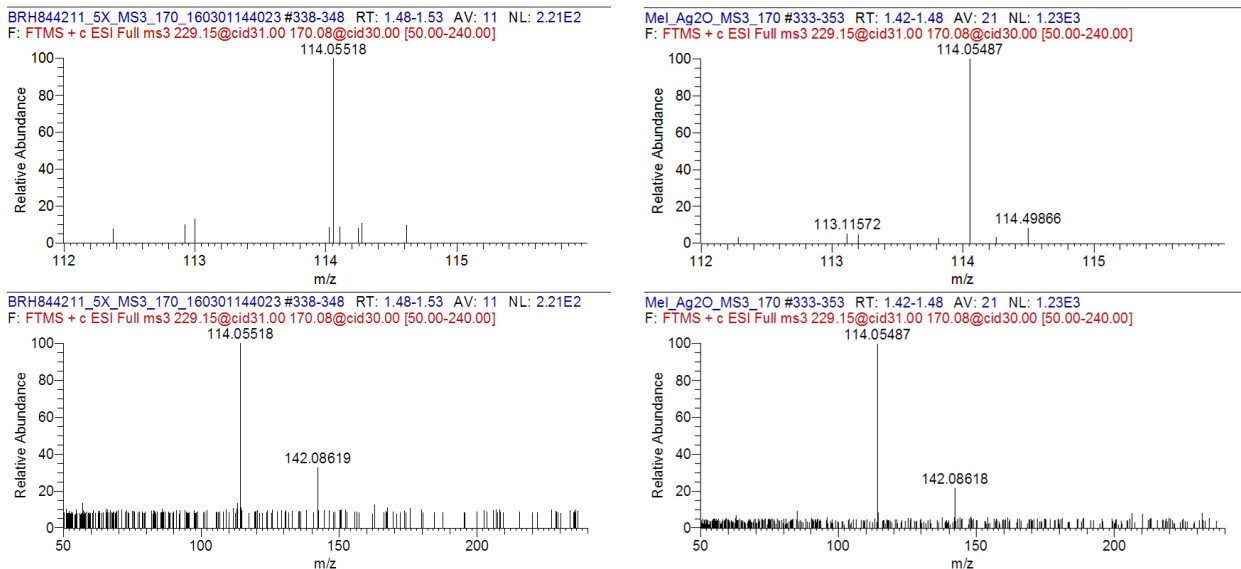

**Figure S9.** MS<sup>3</sup> spectra of  $m/z$  229/170 of x17299 (left) and synthetic L,L-TMAP (right) with expansion (top).

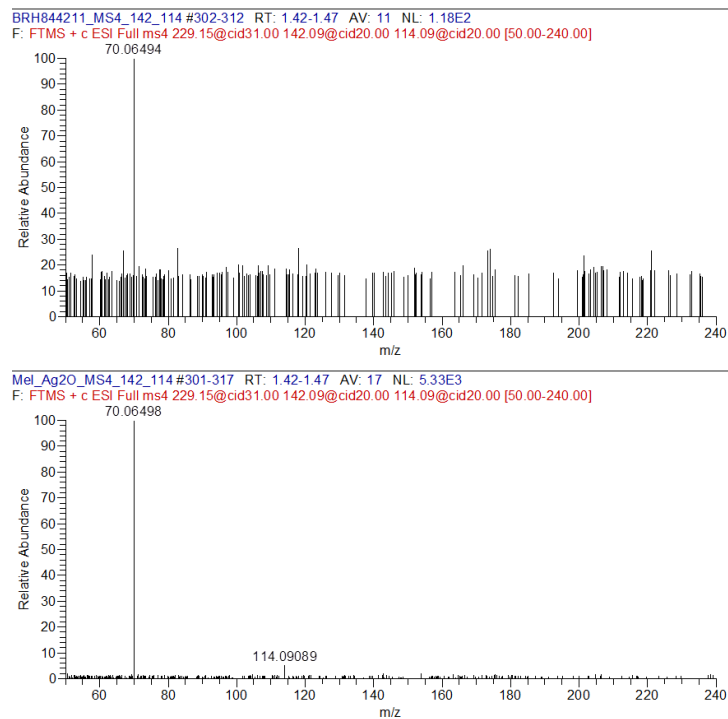

**Figure S10.** MS<sup>4</sup> spectra of *m/z* 229/142/114 of synthetic L,L-TMAP (bottom) and x17299 (top) for comparison.

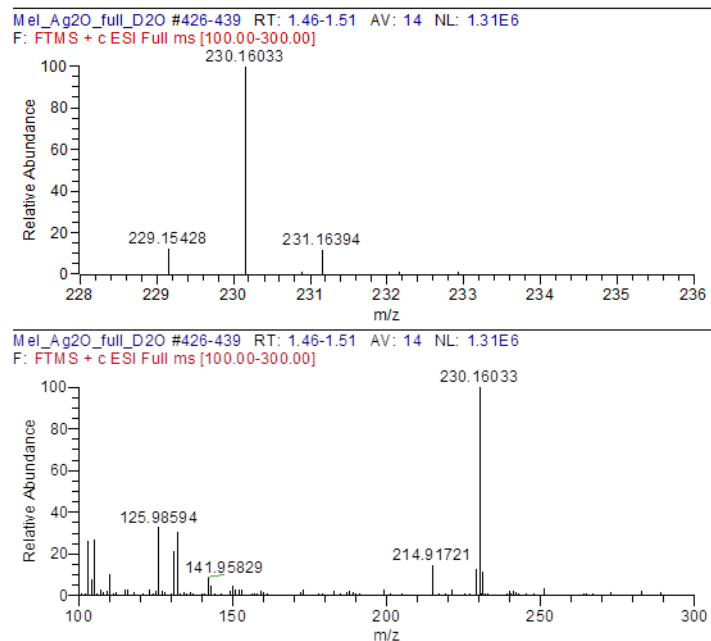

**Figure S11.** MS spectrum of deuterated synthetic L,L-TMAP with expansion (top).

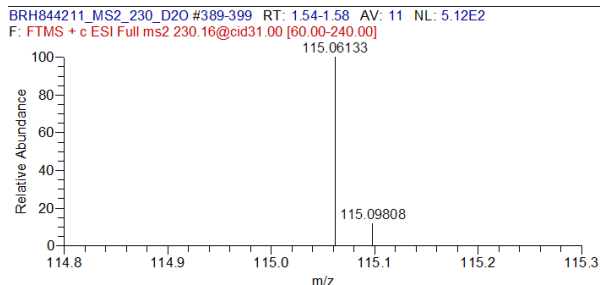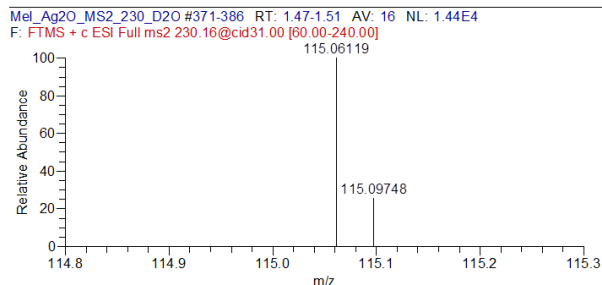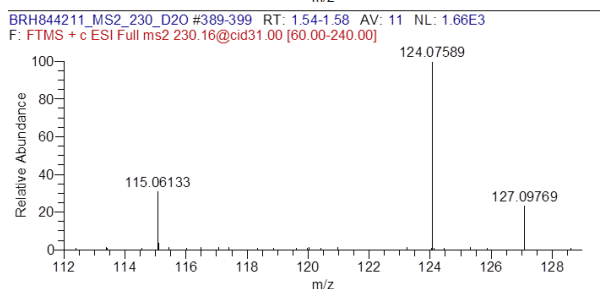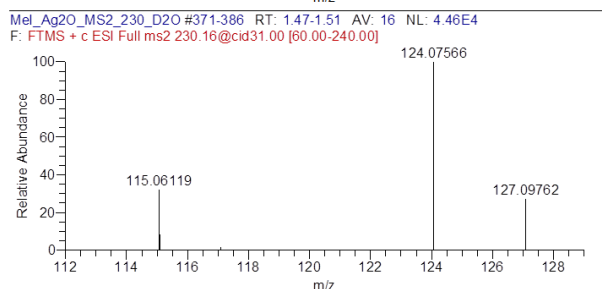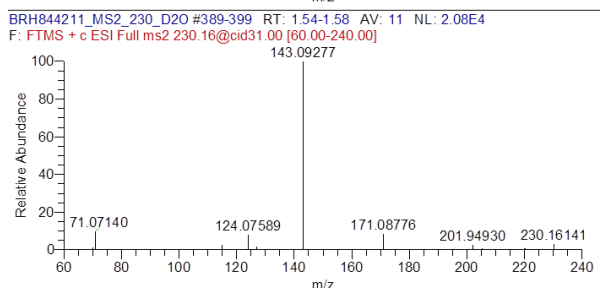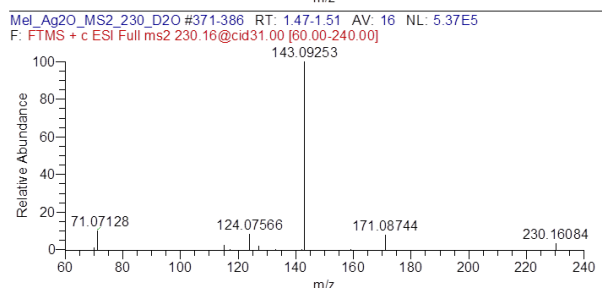

**Figure S12.** MS<sup>2</sup> spectra of deuterated x17299 (left) and synthetic L,L-TMAP (right) with expansions (top and middle).

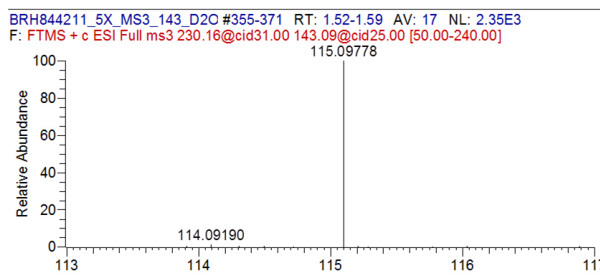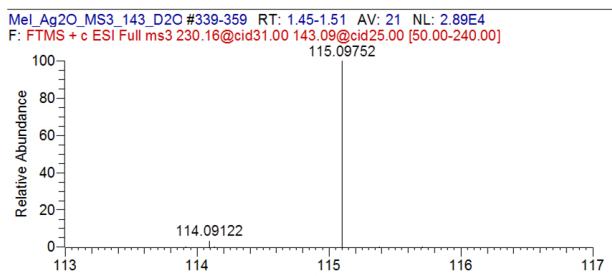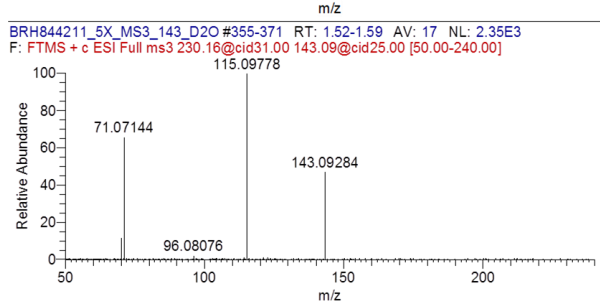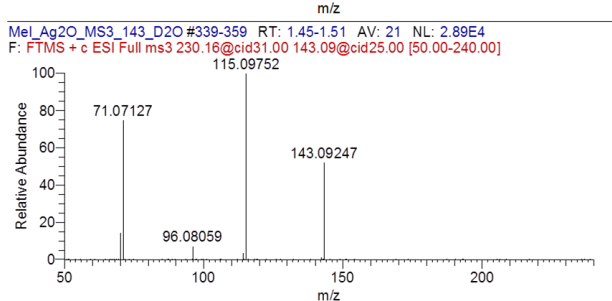

**Figure S13.** MS<sup>3</sup> spectra of *m/z* 230/143 of deuterated x17299 (left) and synthetic L,L-TMAP (right) with expansion (top).

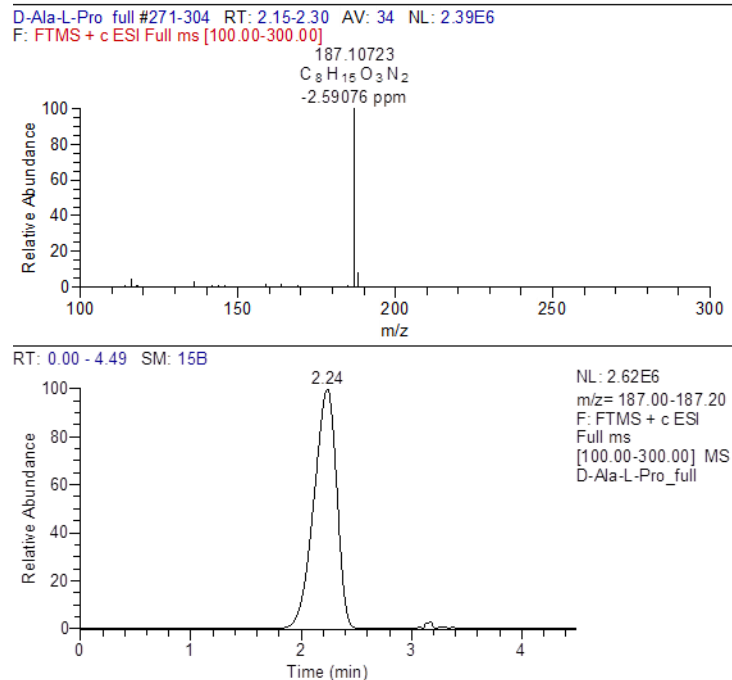

**Figure S14.** LC/MS chromatogram and spectrum of synthetic D-alanyl-L-proline (2.24 min).

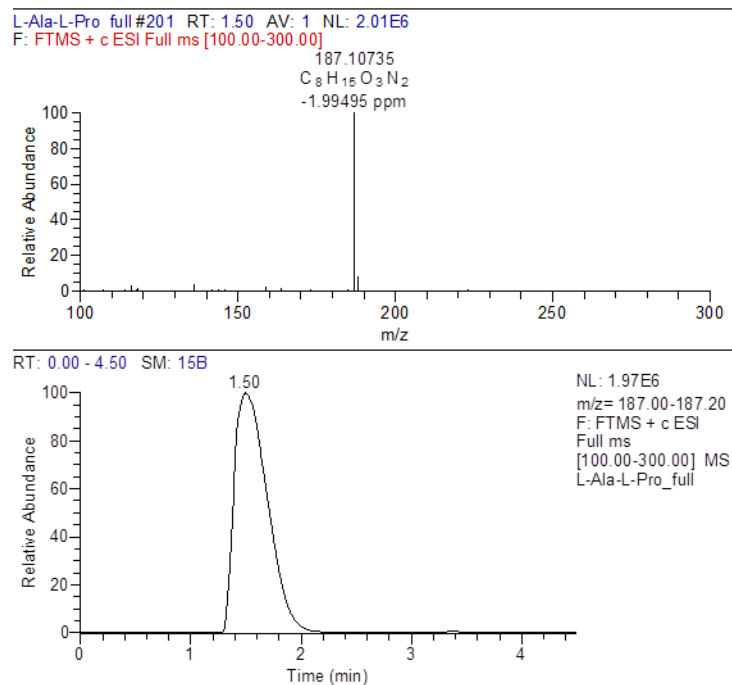

**Figure S15.** LC/MS chromatogram and spectrum of L-alanyl-L-proline (1.50 min) from TCI for comparison.

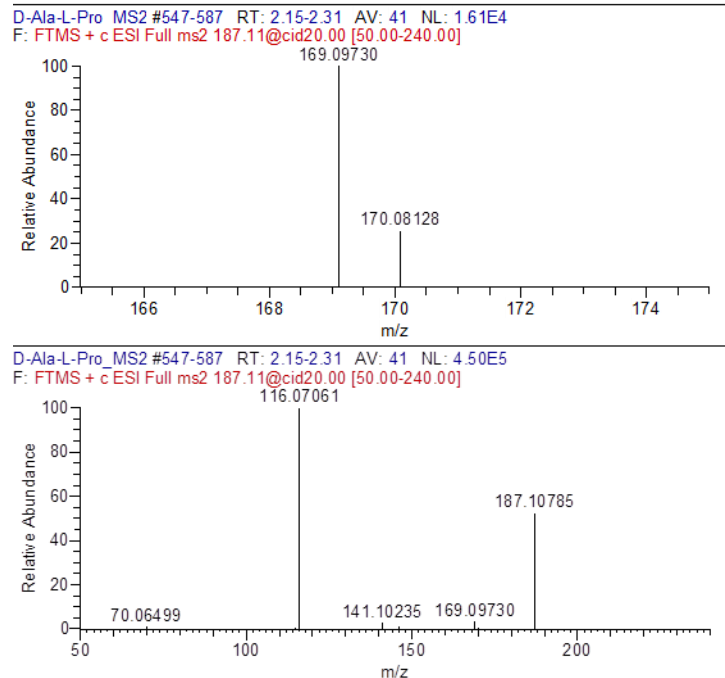

**Figure S16.** MS<sup>2</sup> spectrum of synthetic D-alanyl-L-proline with expansion (top).

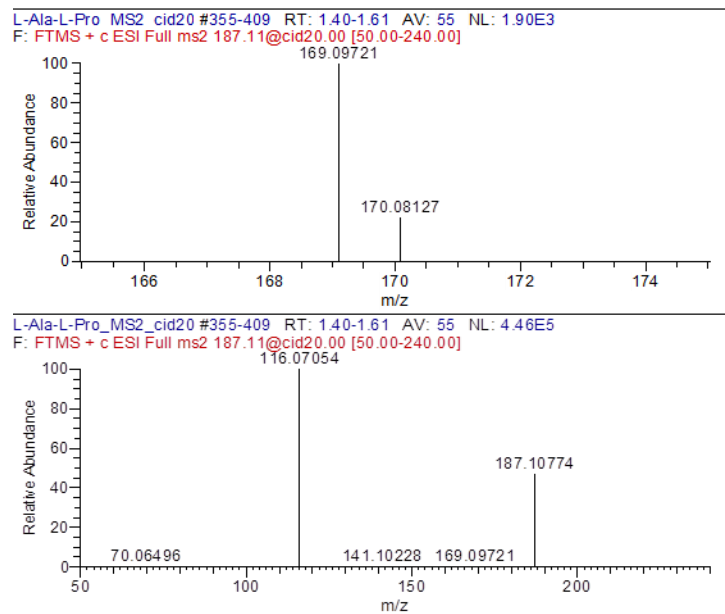

**Figure S17.** MS<sup>2</sup> spectrum of L-alanyl-L-proline from TCI with expansion (top) for comparison.

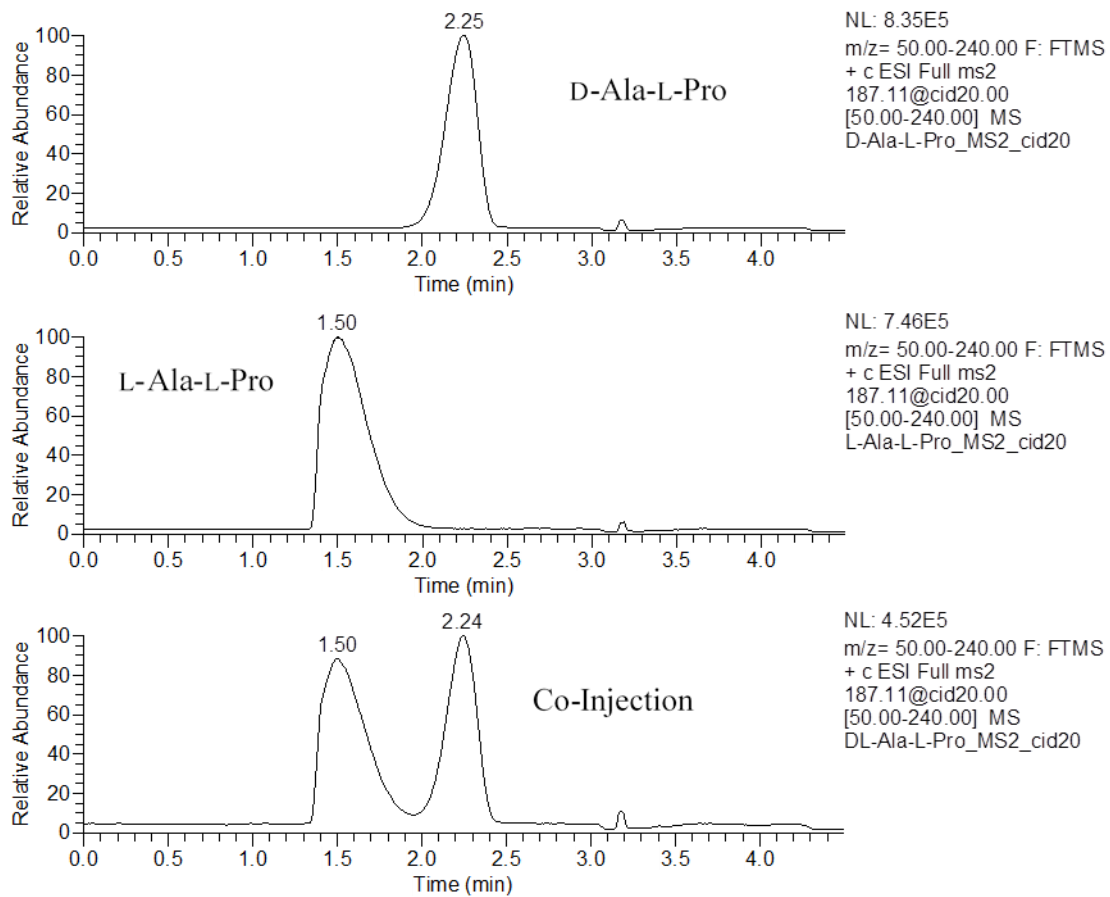

**Figure S18.** LC-MS/MS chromatograms of D-alanyl-L-proline (top, 2.25 min, synthesized), L-alanyl-L-proline (middle, 1.50 min, from TCI), and a mixture of the two (bottom).

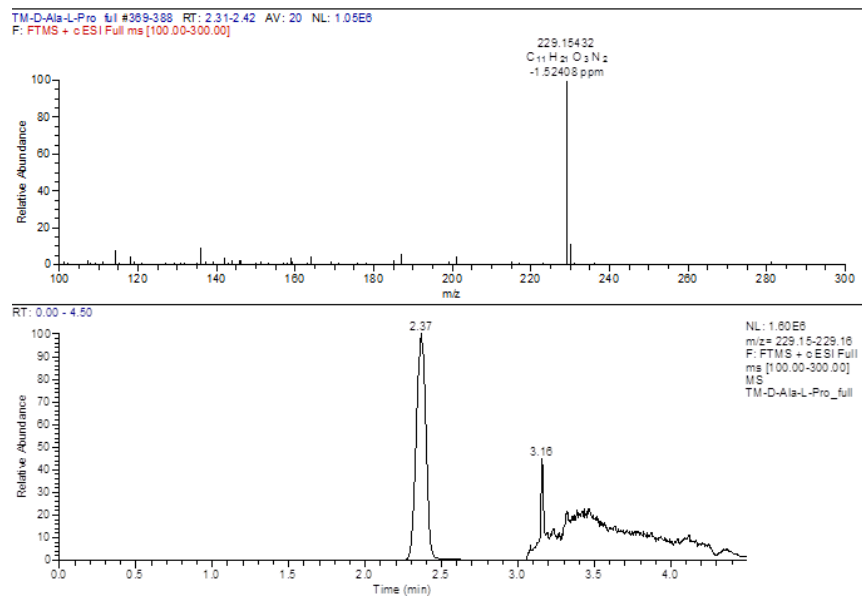

**Figure S19.** LC/MS chromatogram and spectrum of synthetic D,L-TMAP (2.37 min).

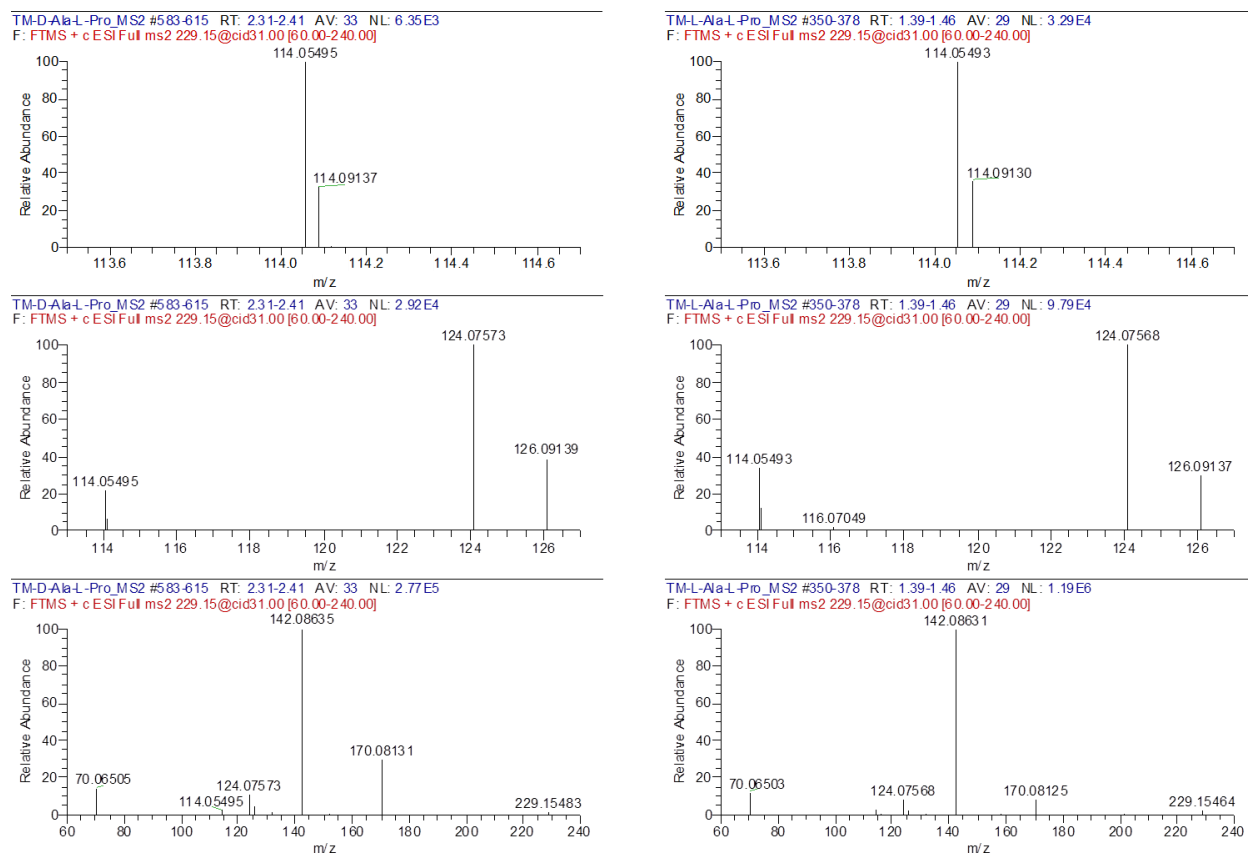

**Figure S20.** MS<sup>2</sup> spectra of synthetic D,L-TMAP (left) and L,L-TMAP (right) with expansions (top and middle) for comparison.

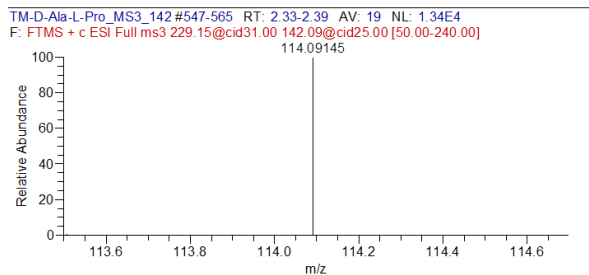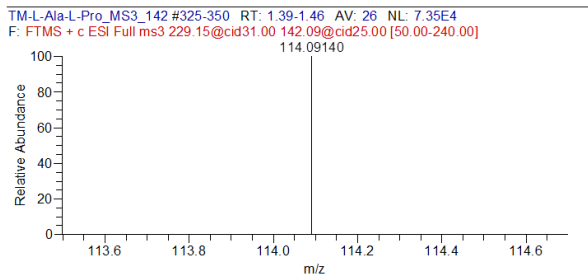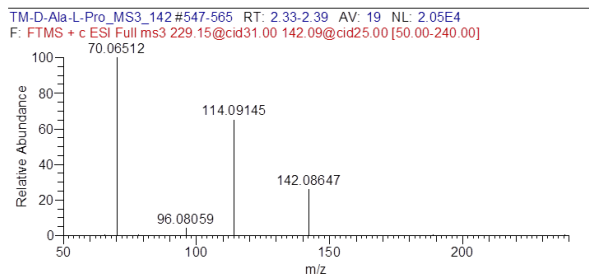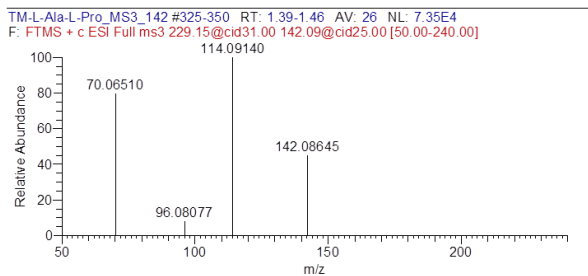

**Figure S21.** MS<sup>3</sup> spectra of  $m/z$  229/142 of synthetic D,L-TMAP (left) and L,L-TMAP (right) with expansion (top) for comparison.

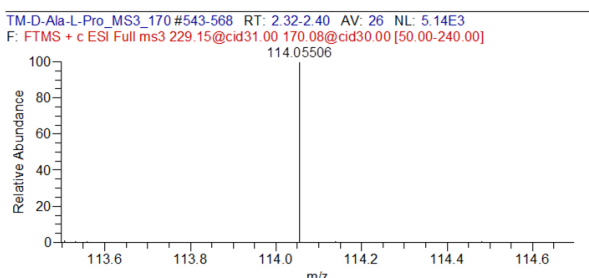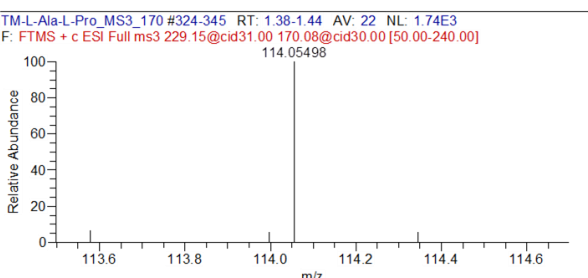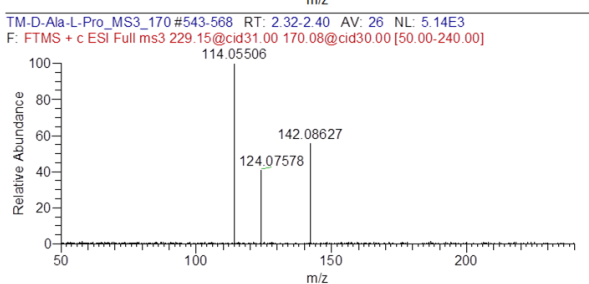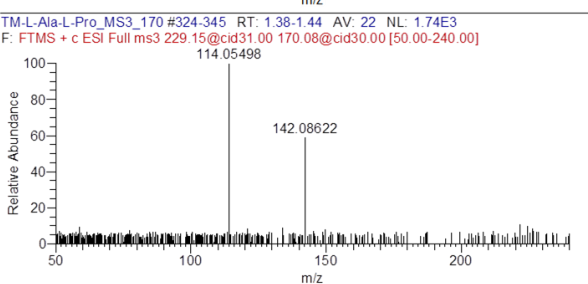

**Figure S22.** MS<sup>3</sup> spectra of  $m/z$  229/170 of synthetic D,L-TMAP (left) and L,L-TMAP (right) with expansion (top) for comparison.



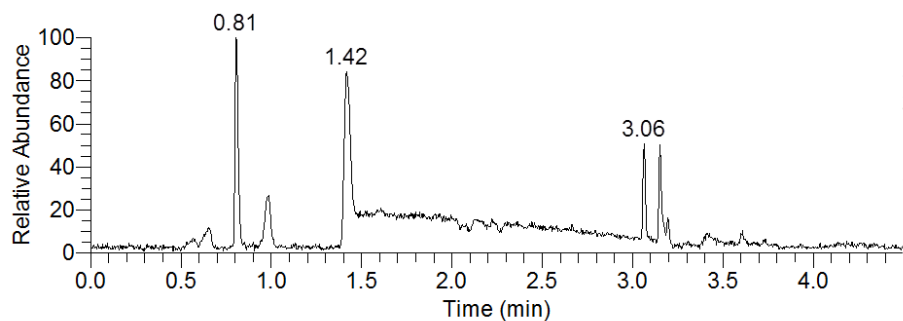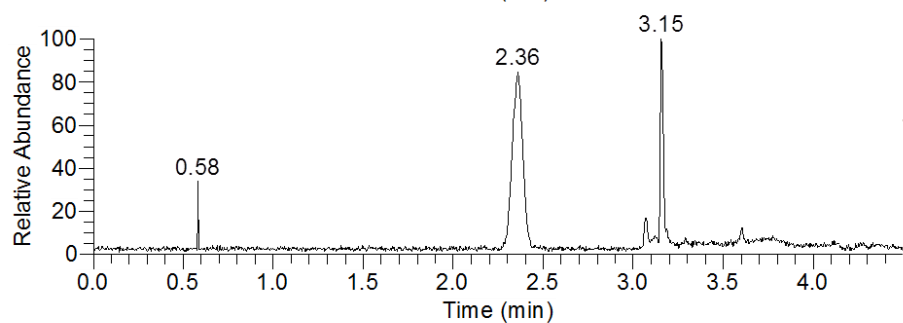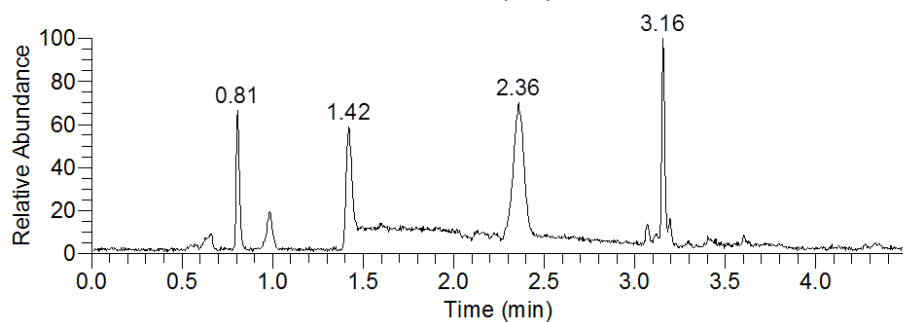

**Figure S23.** LC-MS/MS chromatograms of x17299 (1.42 min) in a plasma extract (top), synthetic D,L-TMAP (2.36 min, middle), and their co-injection (bottom).

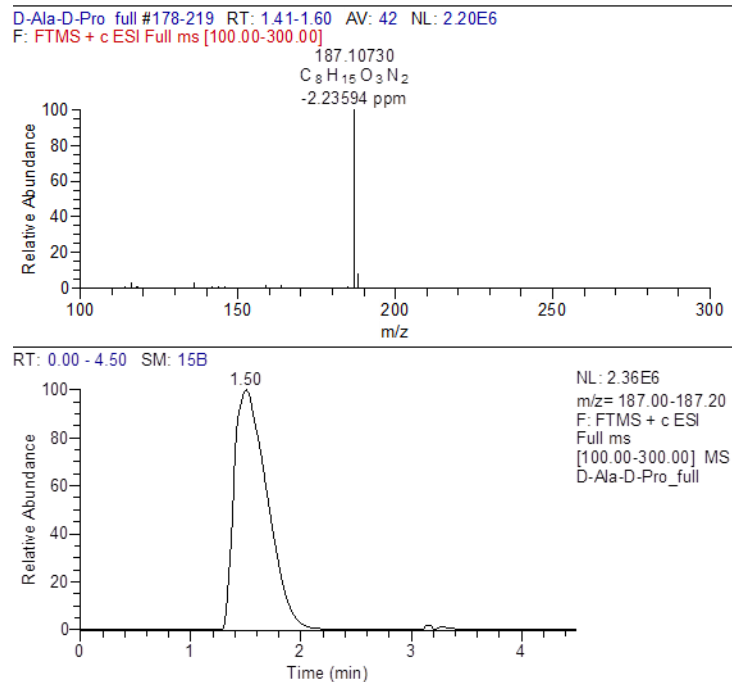

**Figure S24.** LC/MS chromatogram and spectrum of synthetic D-alanyl-D-proline (1.50 min).

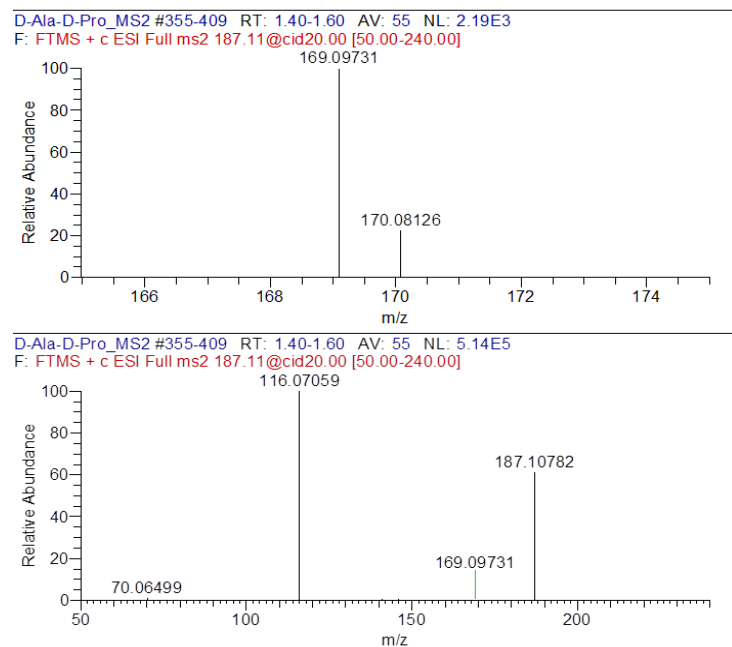

**Figure S25.** MS<sup>2</sup> spectrum of synthetic D-alanyl-D-proline with expansion (top).

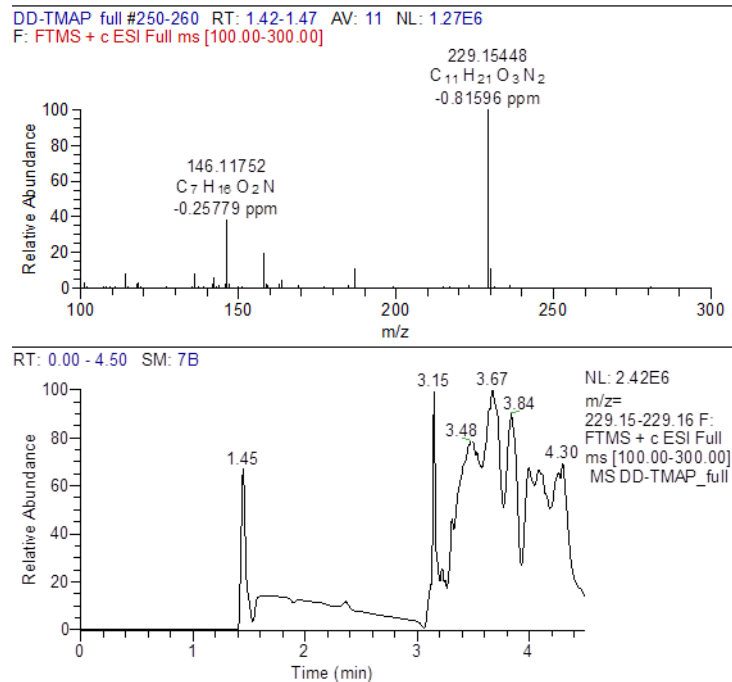

**Figure S26.** LC/MS chromatogram and spectrum of synthetic D,D-TMAP (1.45 min).

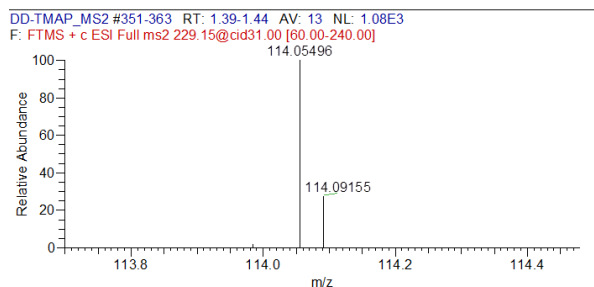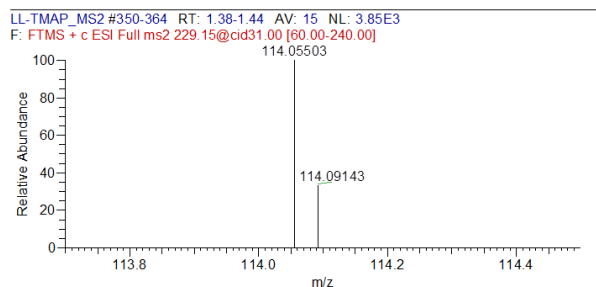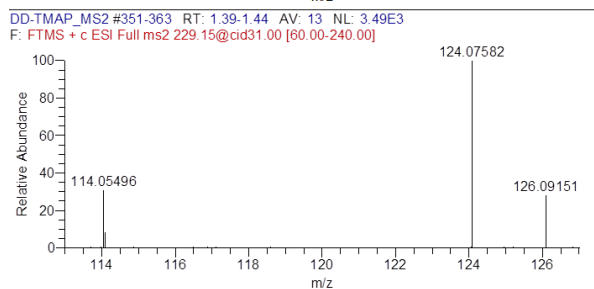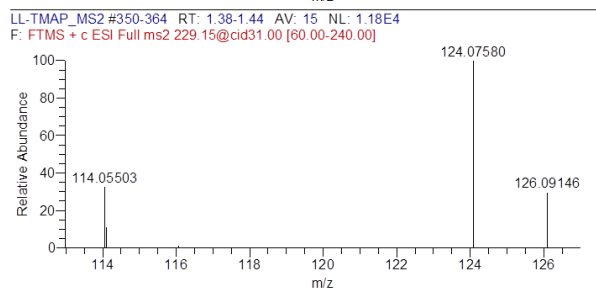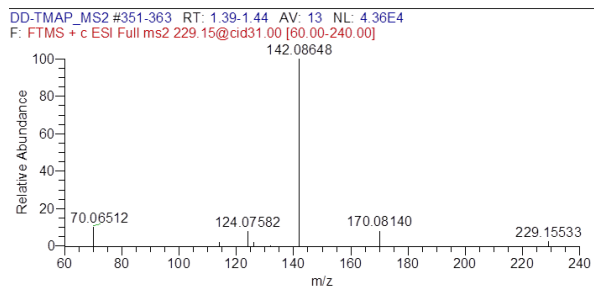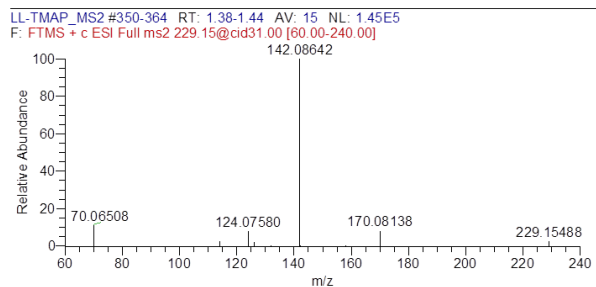

**Figure S27.** MS<sup>2</sup> spectra of synthetic D,D-TMAP (left) and L,L-TMAP (right) with expansions (top and middle) for comparison.

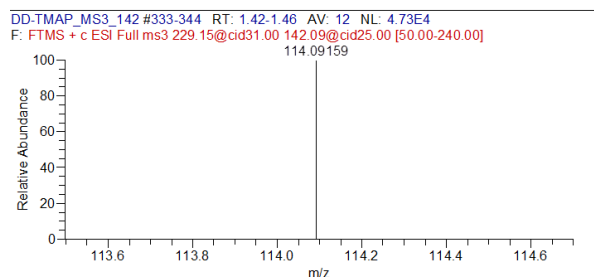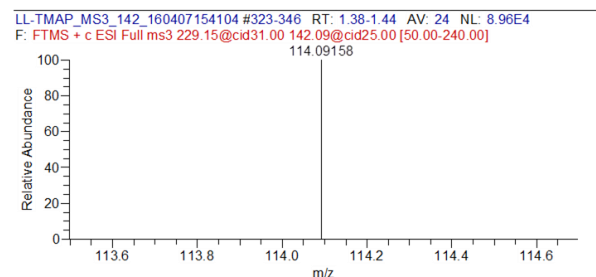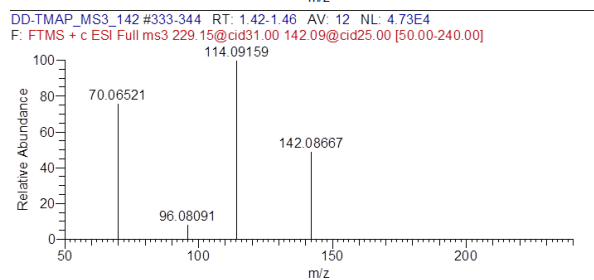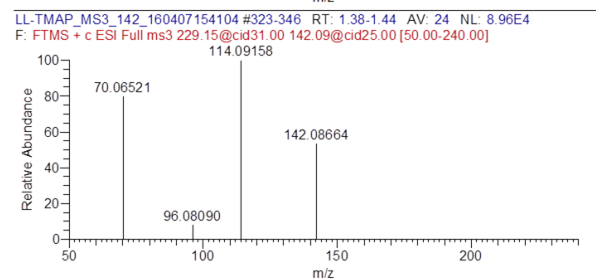

**Figure S28.** MS<sup>3</sup> spectra of *m/z* 229/142 of synthetic D,D-TMAP (left) and L,L-TMAP (right) with expansion (top) for comparison.

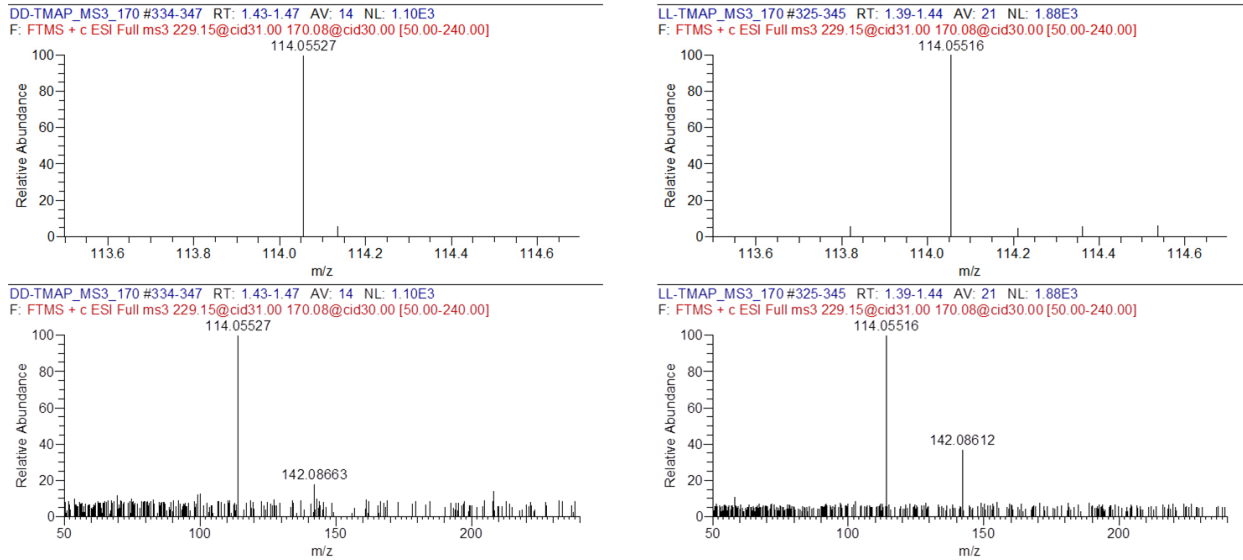

**S-Figure S29.** MS<sup>3</sup> spectra of *m/z* 229/170 of synthetic D,D-TMAP (left) and L,L-TMAP (right) with expansion (top) for comparison.

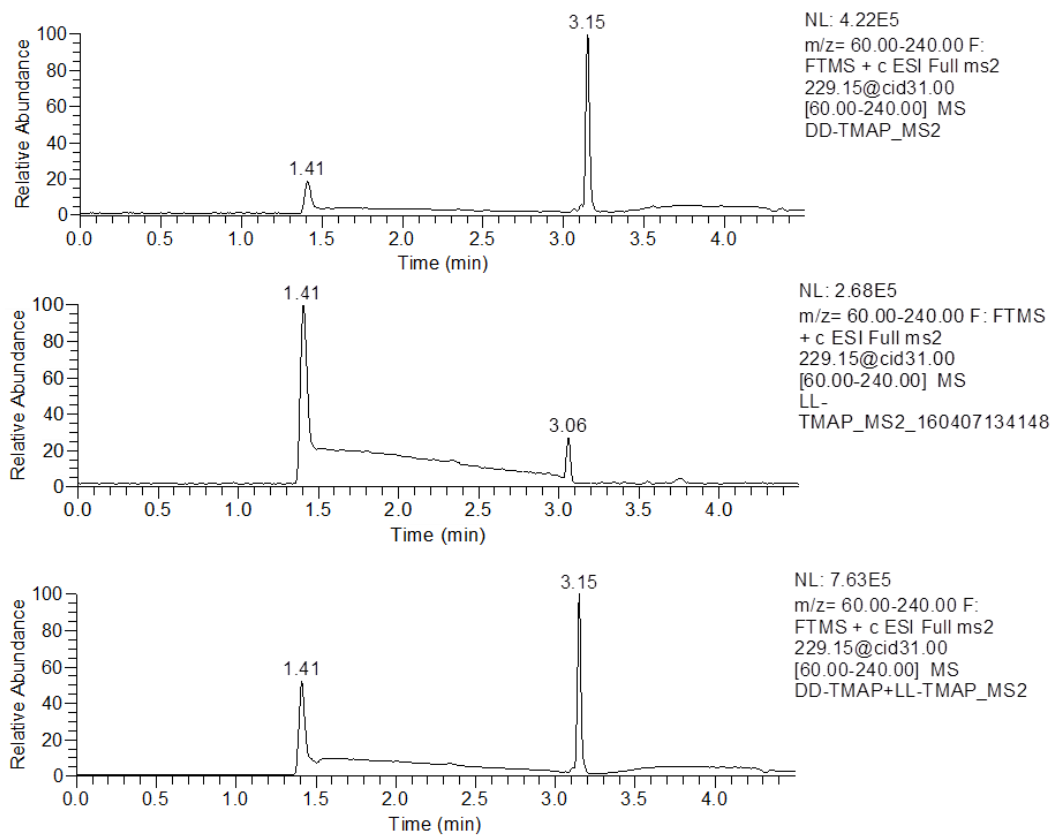

**Figure S30.** LC-MS/MS chromatograms of synthetic D,D-TMAP (1.41 min, top), L,L-TMAP (1.41 min, middle), and their co-injection (bottom).

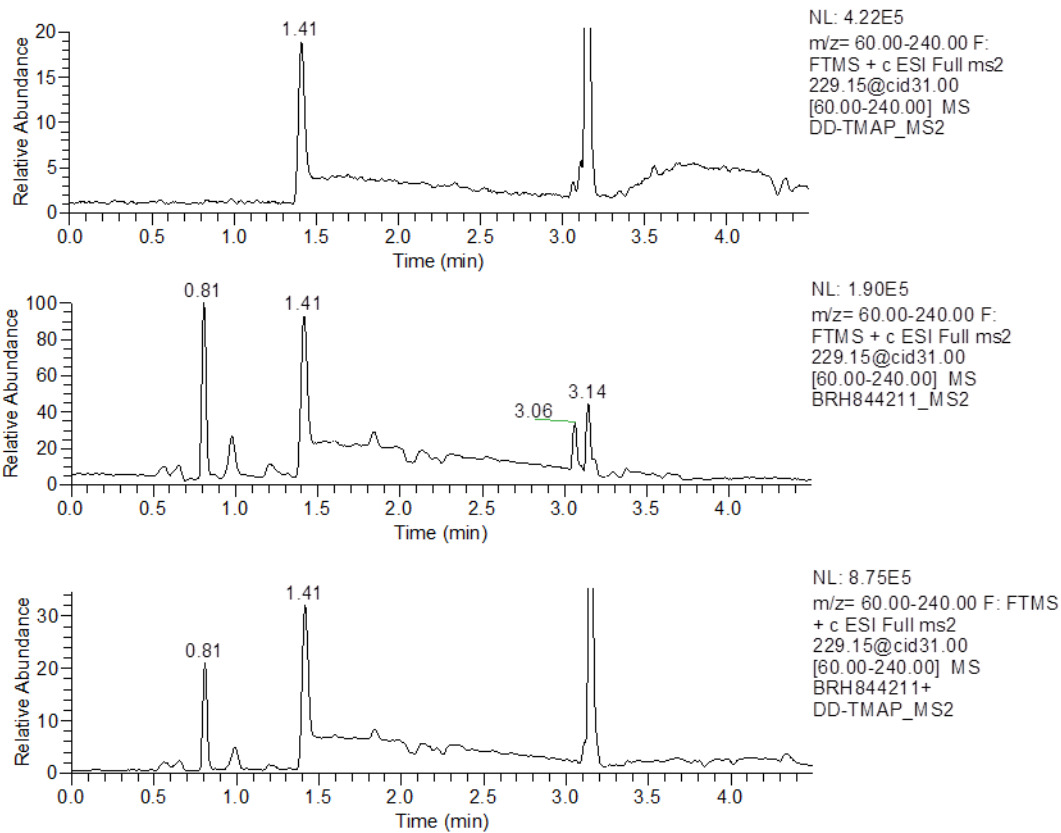

**Figure S31.** LC-MS/MS chromatograms of synthetic D,D-TMAP (1.41 min, top), x17299 (1.41 min, middle) in a plasma extract, and their co-injection (bottom).

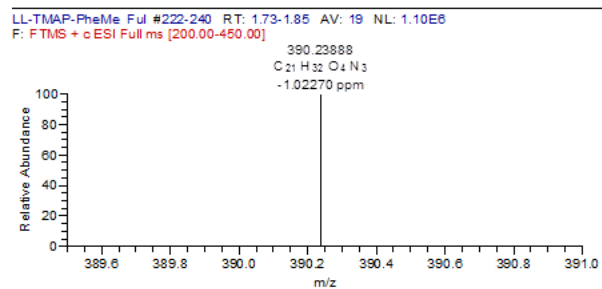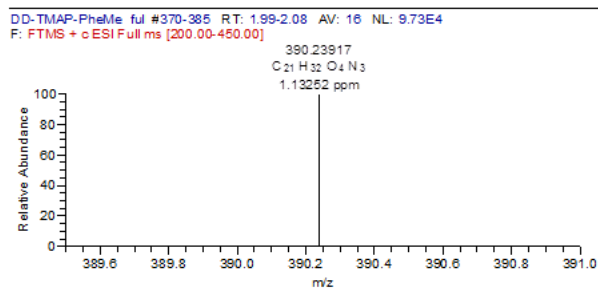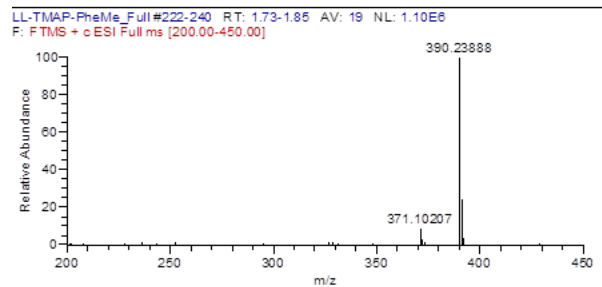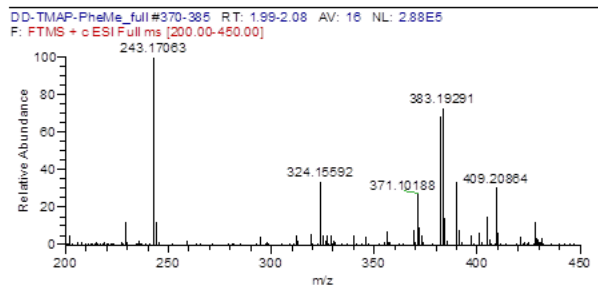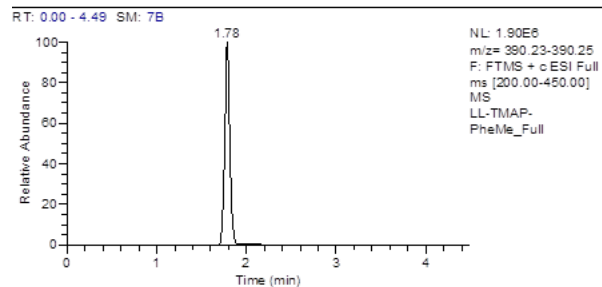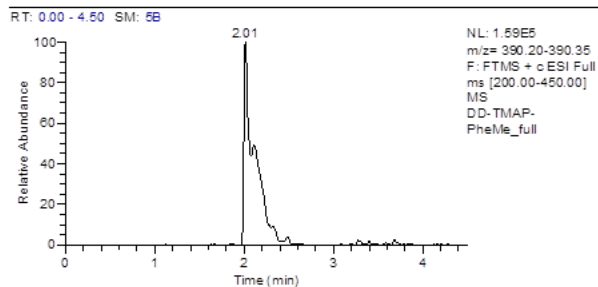

**Figure S32.** LC/MS chromatograms and mass spectra of L,L-TMAP-L-Phe-OMe (1.78 min, left) and D,D-TMAP-L-Phe-OMe (2.01 min, right) with expansions (top).

BRH844211-PheMe\_MS2 #442-462 RT: 1.74-1.82 AV: 21 SB: 15 1.66-1.72 NL: 2.63E4  
F: FTMS + c ESI Full ms 2 390.24@cid28.00 [105.00-400.00]

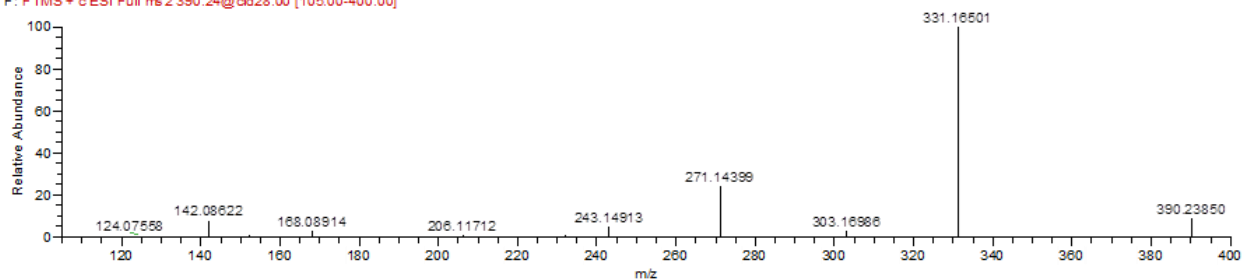

LL-TMAP-PheMe\_MS2 #440-469 RT: 1.75-1.82 AV: 20 NL: 4.67E4  
F: FTMS + c ESI Full ms 2 390.24@cid28.00 [105.00-400.00]

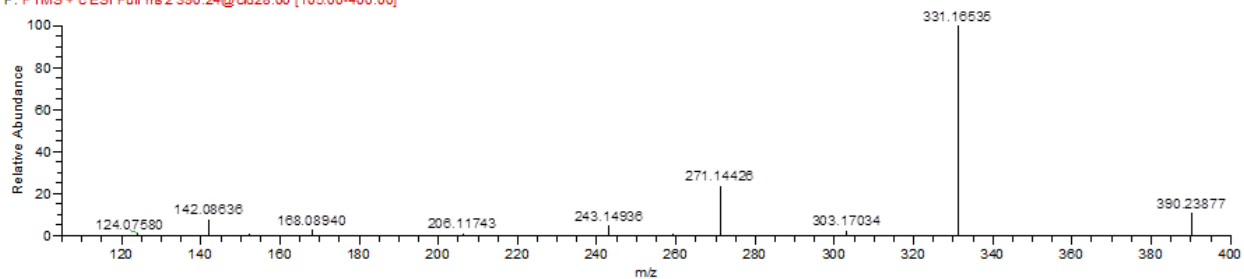

DD-TMAP-PheMe\_MS2 #500-523 RT: 1.98-2.08 AV: 24 NL: 5.98E4  
F: FTMS + c ESI Full ms 2 390.24@cid28.00 [105.00-400.00]

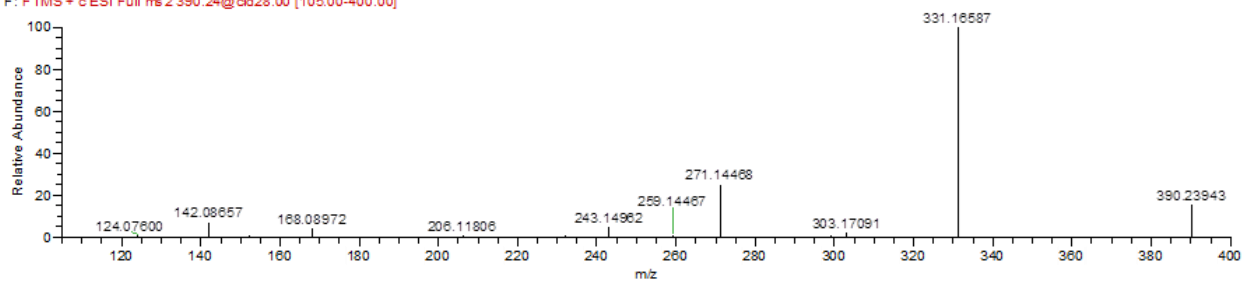

**Figure S33.** MS<sup>2</sup> spectra of L,L-TMAP-L-Phe-OMe (middle), D,D-TMAP-L-Phe-OMe (bottom), and x17299-L-Phe-OMe (top).



LL-TMAP-PheMe\_MS3\_331 #411-436 RT: 1.75-1.82 AV: 26 NL: 2.53E5  
F: FTMS + c ESI Full ms3 390.24@cid28.00 331.17@cid25.00 [90.00-340.00]

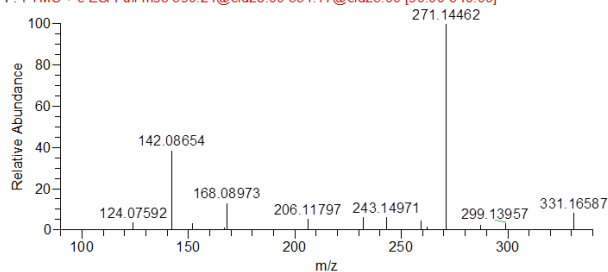

DD-TMAP-PheMe\_MS3\_331 #467-487 RT: 1.99-2.07 AV: 21 NL: 1.28E4  
F: FTMS + c ESI Full ms3 390.24@cid28.00 331.17@cid25.00 [90.00-340.00]

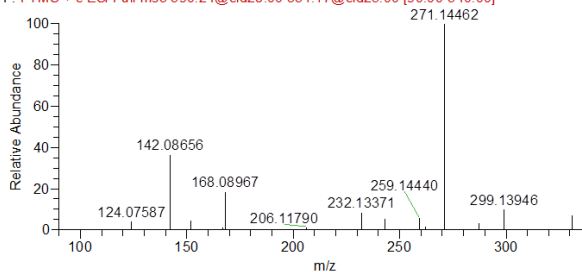

LL-TMAP-PheMe\_MS3\_271 #410-437 RT: 1.74-1.82 AV: 28 NL: 2.25E5  
F: FTMS + c ESI Full ms3 390.24@cid28.00 271.14@cid25.00 [70.00-340.00]

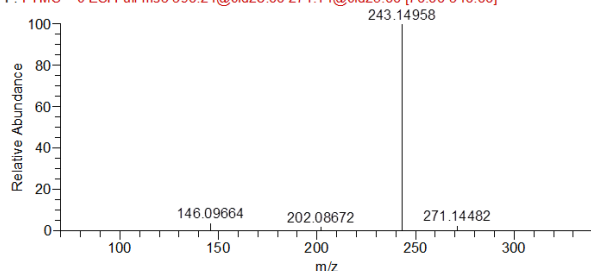

DD-TMAP-PheMe\_MS3\_271 #469-491 RT: 1.99-2.09 AV: 23 NL: 1.26E4  
F: FTMS + c ESI Full ms3 390.24@cid28.00 271.14@cid25.00 [70.00-340.00]

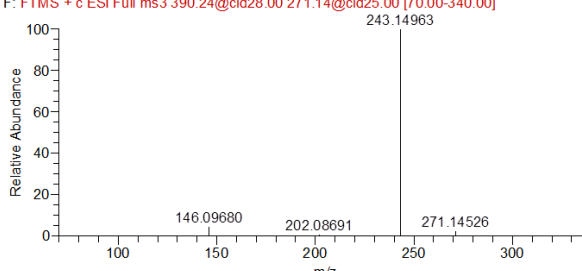

LL-TMAP-PheMe\_MS3\_243 #411-440 RT: 1.75-1.83 AV: 30 NL: 3.81E4  
F: FTMS + c ESI Full ms3 390.24@cid28.00 243.15@cid25.00 [65.00-340.00]

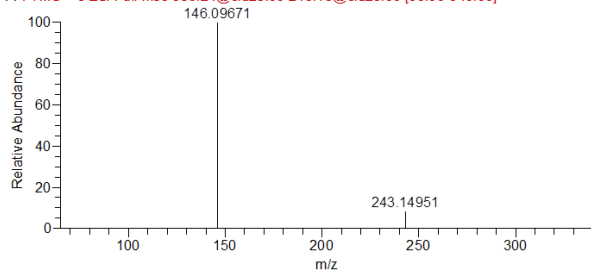

DD-TMAP-PheMe\_MS3\_243 #465-480 RT: 1.98-2.04 AV: 16 NL: 1.86E3  
F: FTMS + c ESI Full ms3 390.24@cid28.00 243.15@cid25.00 [65.00-340.00]

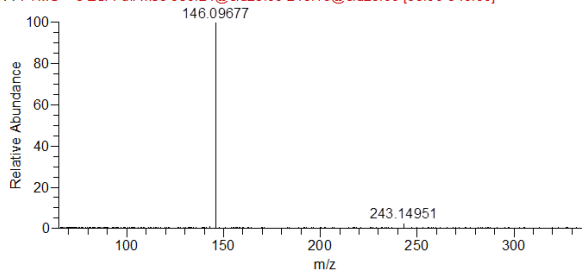

**Figure S34.** MS<sup>3</sup> spectra of  $m/z$  390/331 (top),  $m/z$  390/271 (middle), and  $m/z$  390/243 (bottom) of L,L-TMAP-L-Phe-OMe (left) and D,D-TMAP-L-Phe-OMe (right).

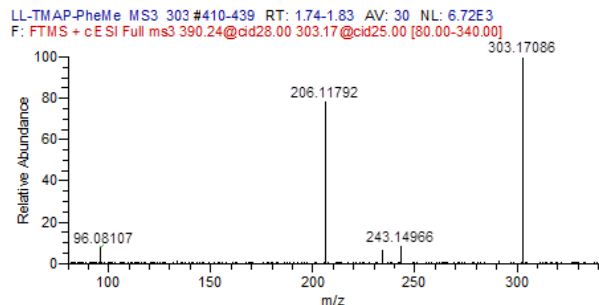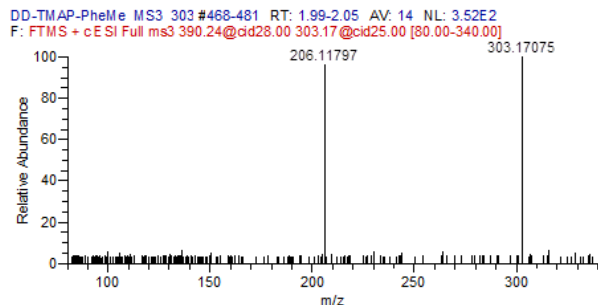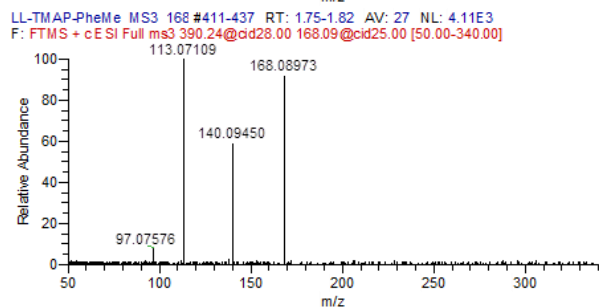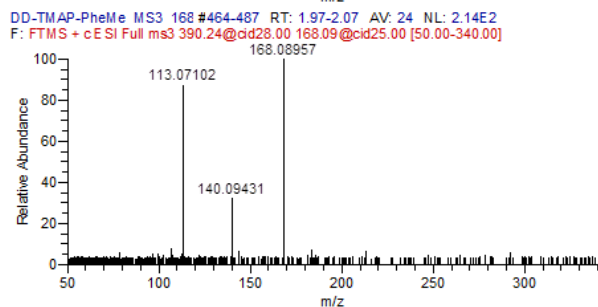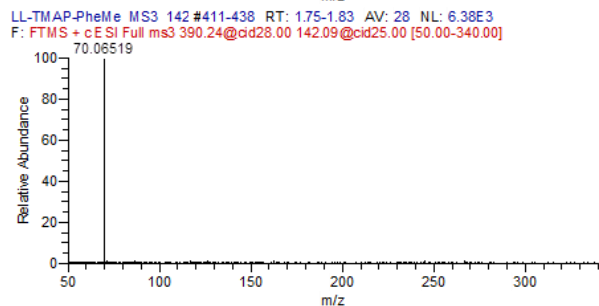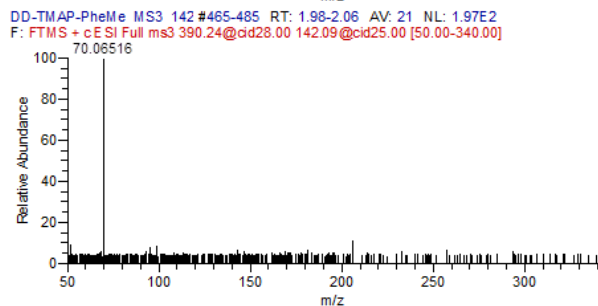

**Figure S35.** MS<sup>3</sup> spectra of *m/z* 390/303 (top), *m/z* 390/168 (middle), and *m/z* 390/142 (bottom) of L,L-TMAP-L-Phe-OMe (left) and D,D-TMAP-L-Phe-OMe (right).

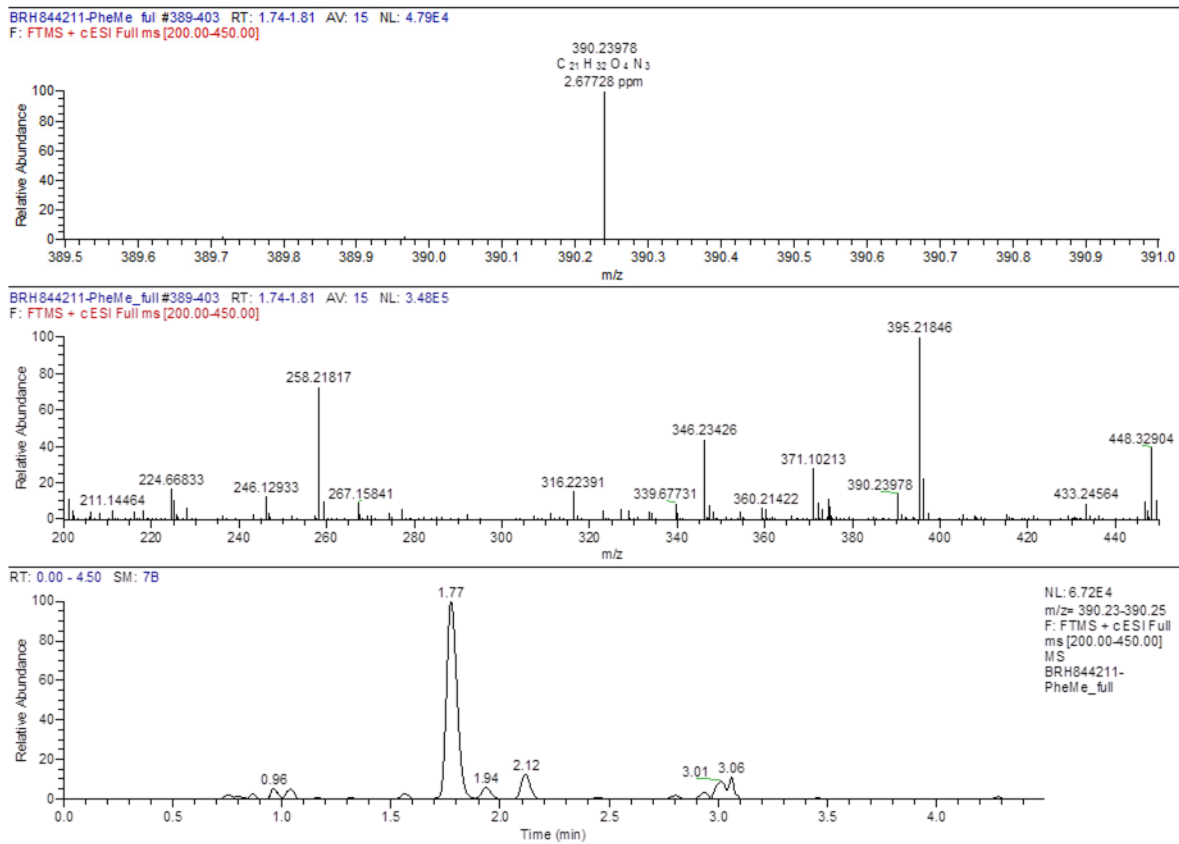

**Figure S36.** LC/MS chromatograms and mass spectrum of x17299-L-Phe-OMe (1.77 min) with expansion (top).

BRH844211-PheMe\_MS3\_331#419-426 RT: 1.76-1.79 AV: 8 NL: 9.52E3  
F: FTMS + c ESI Full ms3 390.24@cid28.00 331.17@cid25.00 [90.00-340.00]

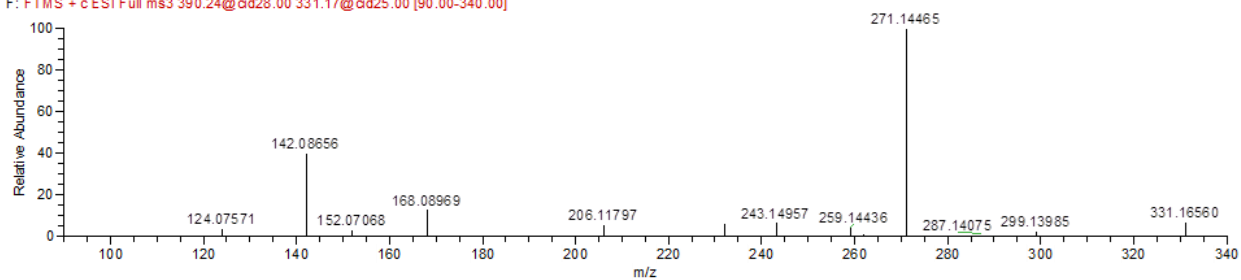

LL-TMAP-PheMe\_MS3\_331#411-436 RT: 1.75-1.82 AV: 26 NL: 2.53E5  
F: FTMS + c ESI Full ms3 390.24@cid28.00 331.17@cid25.00 [90.00-340.00]

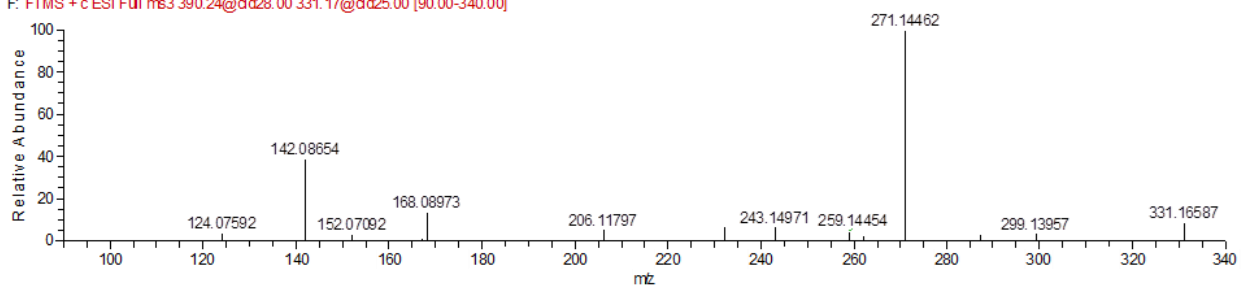

DD-TMAP-PheMe\_MS3\_331#471-489 RT: 2.00-2.08 AV: 19 NL: 1.35E4  
F: FTMS + c ESI Full ms3 390.24@cid28.00 331.17@cid25.00 [90.00-340.00]

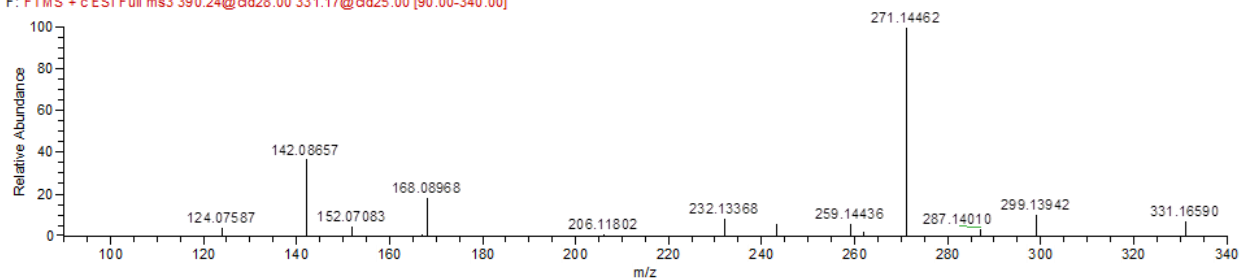

**Figure S37.** MS<sup>3</sup> spectra of *m/z* 390/331 of x17299-L-Phe-OMe (top), L,L-TMAP-L-Phe-OMe (middle), and D,D-TMAP-L-Phe-OMe (bottom).

BRH844211-PheMe\_MS3\_271 #413-433 RT: 1.74-1.82 AV: 21 NL: 4.64E3  
F: FTMS + c ESI Full ms3 390.24@cid28.00 271.14@cid25.00 [70.00-340.00]

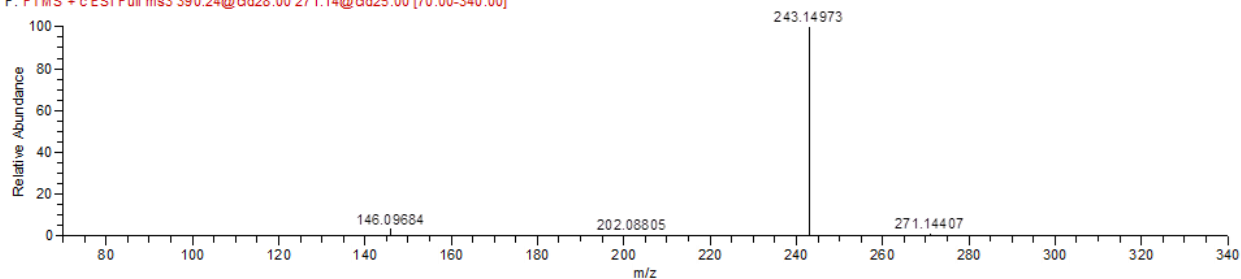

LL-TMAP-PheMe\_MS3\_271 #410-437 RT: 1.74-1.82 AV: 28 NL: 2.25E5  
F: FTMS + c ESI Full ms3 390.24@cid28.00 271.14@cid25.00 [70.00-340.00]

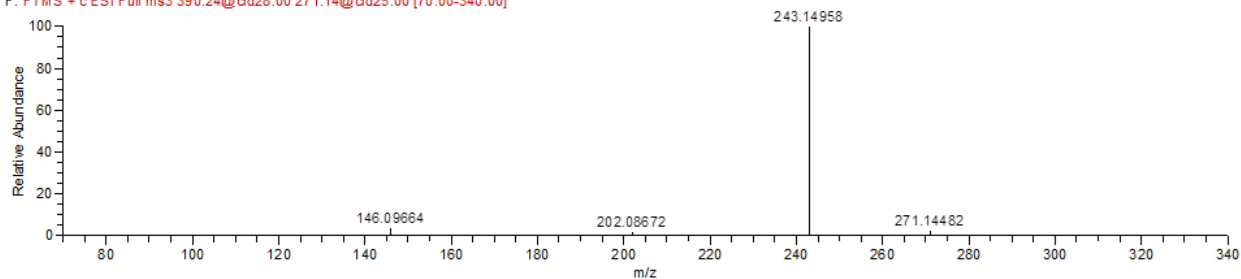

DD-TMAP-PheMe\_MS3\_271 #469-491 RT: 1.99-2.09 AV: 23 NL: 1.26E4  
F: FTMS + c ESI Full ms3 390.24@cid28.00 271.14@cid25.00 [70.00-340.00]

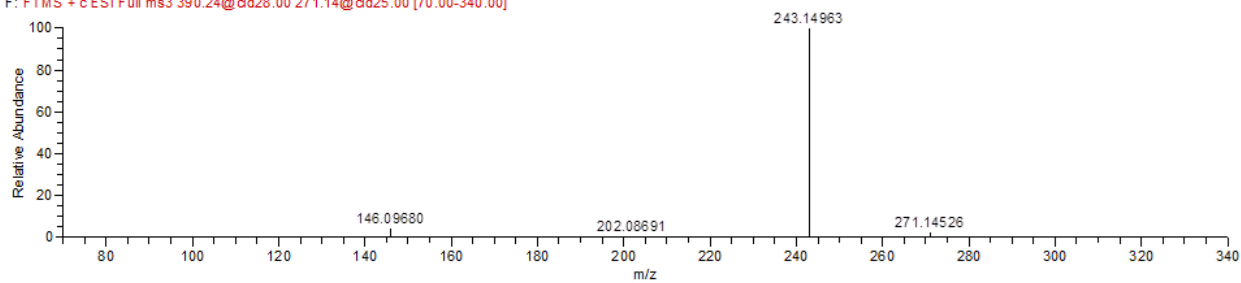

**Figure S38.** MS<sup>3</sup> spectra of *m/z* 390/271 of x17299-L-Phe-OMe (top), L,L-TMAP-L-Phe-OMe (middle), and D,D-TMAP-L-Phe-OMe (bottom).

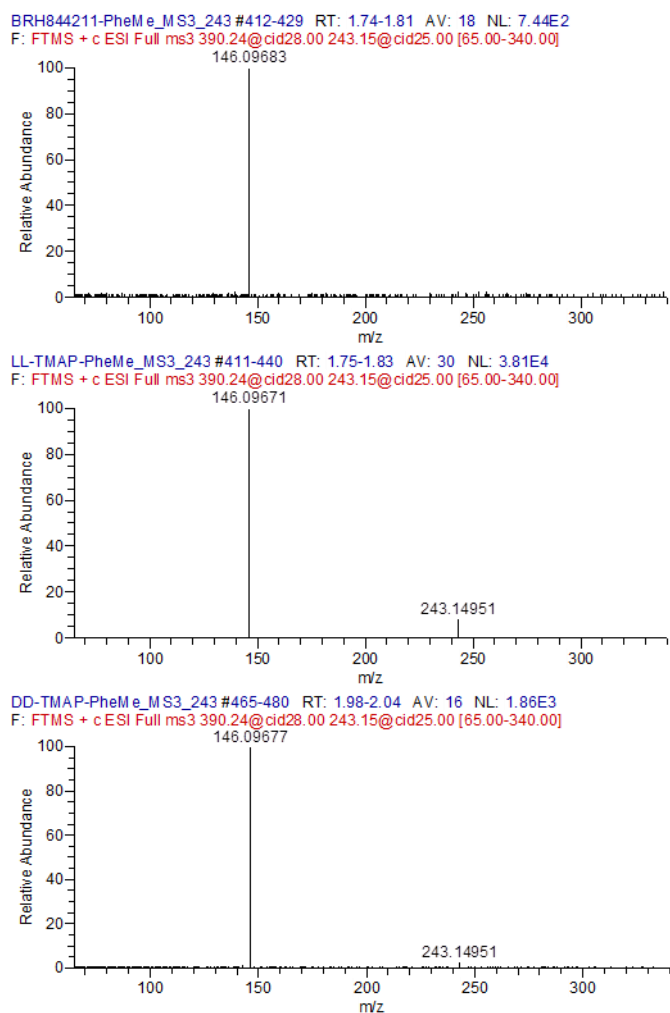

**Figure S39.** MS<sup>3</sup> spectra of  $m/z$  390/243 of x17299-L-Phe-OMe (top), L,L-TMAP-L-Phe-OMe (middle), and D,D-TMAP-L-Phe-OMe (bottom).

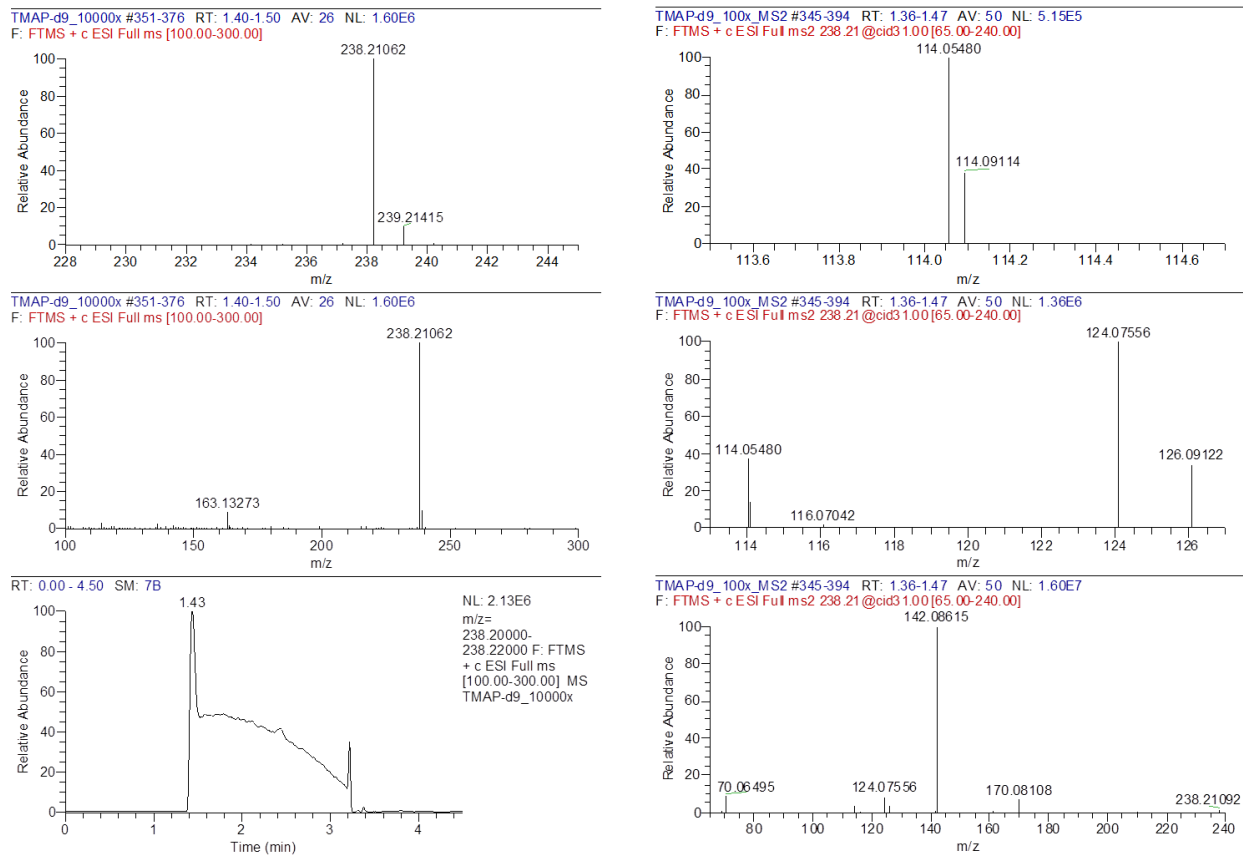

**Figure S40.** LC/MS chromatogram and MS spectrum (left), and MS<sup>2</sup> spectrum (right) of synthetic L,L-TMAP-*d*<sub>9</sub> (1.43 min) with expansions (middle and top).

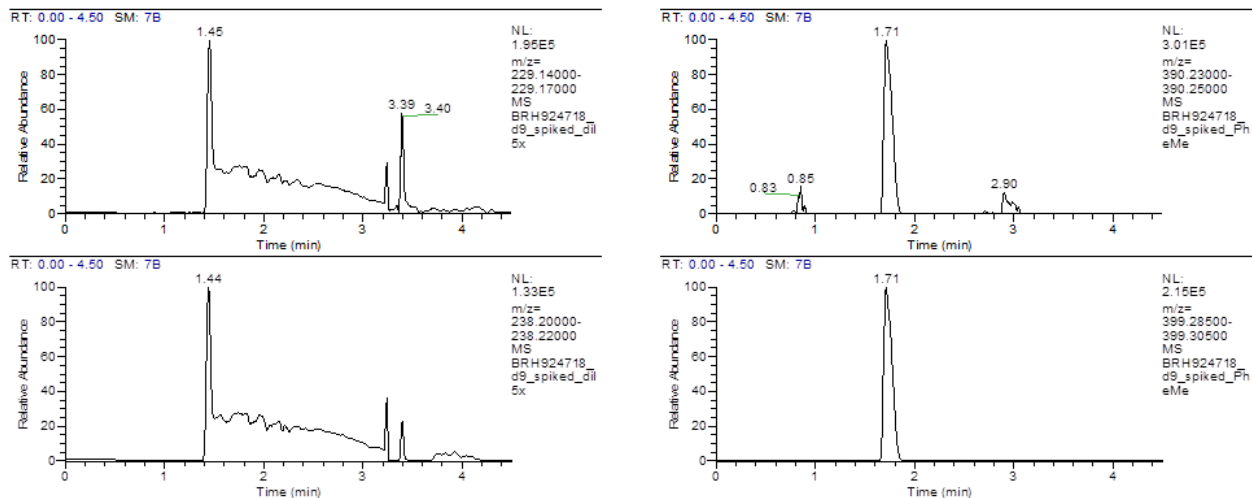

**Figure S41.** LC/MS chromatograms of x17299 (1.45 min, left top) and L,L-TMAP-*d*<sub>9</sub> (1.44 min, left bottom) in a spiked plasma extract, and x17299-L-Phe-OMe (1.71 min, right top) and L,L-TMAP-*d*<sub>9</sub>-L-Phe-OMe (1.71 min, right bottom) in a coupling reaction mixture of the spiked plasma extract.

BRH924718\_d9\_spiked\_PheMe #596-650 RT: 1.67-1.82 AV: 55 NL: 6.41E5  
 F: FTMS + c ESI Full ms [200.00-450.00]

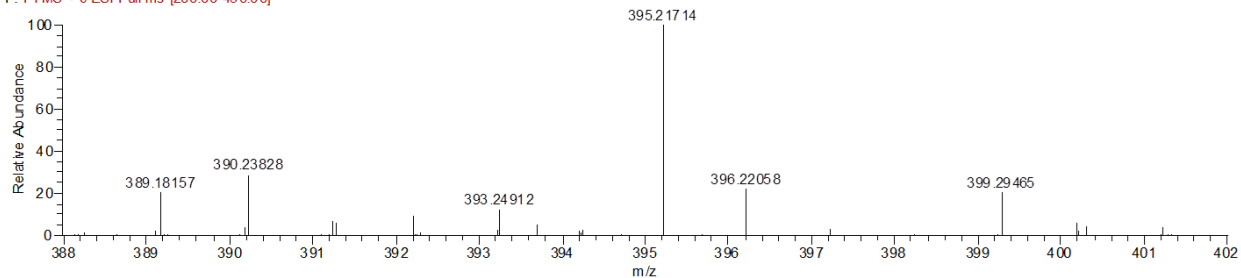

BRH924718\_d9\_spiked\_PheMe\_MS2 #424-449 RT: 1.70-1.80 AV: 13 NL: 4.65E4  
 F: FTMS + c ESI Full ms2 399.30@cid28.00 [105.00-400.00]

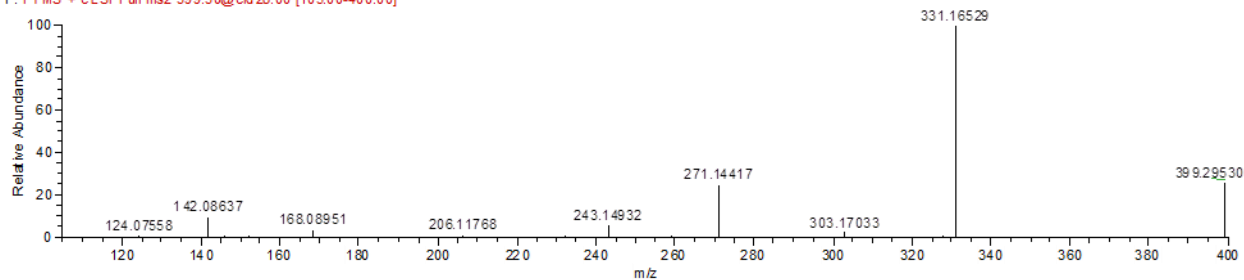

**Figure S42.** MS (top) and MS<sup>2</sup> (bottom) spectra of L,L-TMAP-*d*<sub>9</sub>-L-Phe-OMe.



**Scheme S1.** Proposed fragmentation pathways of TMAP-L-Phe-OMe.

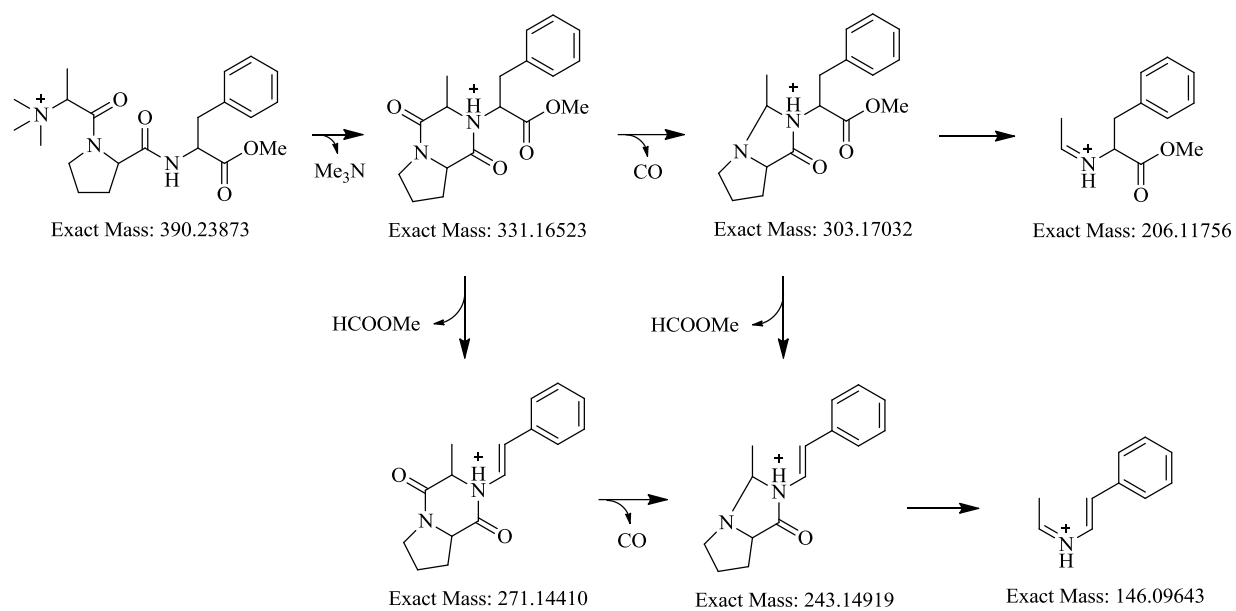

**Table S1.** Spectrum list of MS<sup>2</sup> of x17299.

FTMS + c ESI Full ms2 229.15@cid31.00 [60.00-240.00]

Scan #: 370-384

RT: 1.46-1.52

AV: 15

| m/z       | Intensity | Relative |
|-----------|-----------|----------|
| 70.06502  | 6062.9    | 10.74    |
| 114.05491 | 1535.7    | 2.72     |
| 114.09139 | 496.9     | 0.88     |
| 124.07568 | 4837.1    | 8.57     |
| 126.09128 | 1445.6    | 2.56     |
| 142.08628 | 56456.1   | 100.00   |
| 170.08120 | 4787.5    | 8.48     |
| 229.15460 | 1149.9    | 2.04     |

**Table S2.** Spectrum list of MS<sup>2</sup> of deuterated x17299.

FTMS + c ESI Full ms2 230.16@cid31.00 [60.00-240.00]

Scan #: 389-399

RT: 1.54-1.58

AV: 11

| m/z       | Intensity | Relative |
|-----------|-----------|----------|
| 70.06515  | 238.4     | 1.15     |
| 71.07140  | 2016.4    | 9.70     |
| 115.06133 | 512.3     | 2.47     |
| 115.09808 | 61.5      | 0.30     |
| 124.07589 | 1658.9    | 7.98     |
| 127.09769 | 387.7     | 1.87     |
| 143.09277 | 20781.8   | 100.00   |
| 171.08776 | 1729.7    | 8.32     |
| 201.94930 | 529.3     | 2.55     |
| 205.14789 | 161.4     | 0.78     |
| 219.96103 | 221.1     | 1.06     |
| 220.16469 | 230.3     | 1.11     |
| 230.16141 | 659.6     | 3.17     |

**Table S3.** Spectrum list of MS<sup>2</sup> of synthetic L,L-TMAP.

FTMS + c ESI Full ms2 229.15@cid31.00 [60.00-240.00]

Scan #: 350-363

RT: 1.38-1.44

AV: 14

| m/z       | Intensity | Relative |
|-----------|-----------|----------|
| 70.06508  | 16802.5   | 11.13    |
| 114.05503 | 4028.1    | 2.67     |
| 114.09144 | 1338.5    | 0.89     |
| 124.07580 | 12318.8   | 8.16     |
| 126.09147 | 3656.0    | 2.42     |
| 142.08642 | 151013.7  | 100.00   |
| 170.08138 | 12405.1   | 8.21     |
| 229.15488 | 3817.4    | 2.53     |

**Table S4.** Spectrum list of MS<sup>2</sup> of deuterated synthetic L,L-TMAP.

FTMS + c ESI Full ms2 230.16@cid31.00 [60.00-240.00]

Scan #: 372-388

RT: 1.47-1.51

AV: 17

| m/z       | Intensity | Relative |
|-----------|-----------|----------|
| 70.06498  | 6927.0    | 1.33     |
| 71.07128  | 53715.9   | 10.31    |
| 115.06118 | 13927.7   | 2.67     |
| 115.09750 | 3632.2    | 0.70     |
| 124.07565 | 43278.7   | 8.31     |
| 127.09761 | 11681.4   | 2.24     |
| 143.09252 | 520918.2  | 100.00   |
| 171.08743 | 42265.2   | 8.11     |
| 230.16083 | 18802.8   | 3.61     |

**Table S5.** Spectrum list of MS<sup>2</sup> of synthetic D,L-TMAP.

FTMS + c ESI Full ms2 229.15@cid31.00 [60.00-240.00]

Scan #: 583-615

RT: 2.31-2.41

AV: 33

| m/z       | Intensity | Relative |
|-----------|-----------|----------|
| 70.06505  | 39033.4   | 14.10    |
| 114.05495 | 6350.1    | 2.29     |
| 114.09137 | 2050.1    | 0.74     |
| 124.07573 | 29236.2   | 10.56    |
| 126.09139 | 11389.1   | 4.11     |
| 132.10199 | 3184.4    | 1.15     |
| 142.08635 | 276778.9  | 100.00   |
| 170.08131 | 81733.8   | 29.53    |
| 229.15483 | 2809.2    | 1.01     |

**Table S6.** Spectrum list of MS<sup>2</sup> of synthetic D,D-TMAP.

FTMS + c ESI Full ms2 229.15@cid31.00 [60.00-240.00]

Scan #: 351-363

RT: 1.39-1.44

AV: 13

| m/z       | Intensity | Relative |
|-----------|-----------|----------|
| 70.06512  | 4449.0    | 10.21    |
| 114.05496 | 1077.3    | 2.47     |
| 114.09155 | 296.5     | 0.68     |
| 124.07582 | 3489.2    | 8.01     |
| 126.09151 | 983.4     | 2.26     |
| 142.08648 | 43558.4   | 100.00   |
| 170.08140 | 3615.5    | 8.30     |
| 229.15533 | 1044.3    | 2.40     |

**Table S7.** Spectrum list of MS<sup>2</sup> of L,L-TMAP-L-Phe-OMe.

FTMS + c ESI Full ms2 390.24@cid28.00 [105.00-400.00]

Scan #: 440-459

RT: 1.75-1.82

AV: 20

| m/z       | Intensity | Relative |
|-----------|-----------|----------|
| 124.07580 | 346.0     | 0.76     |
| 142.08636 | 3664.1    | 8.01     |
| 152.07061 | 296.2     | 0.65     |
| 168.08940 | 1324.5    | 2.90     |
| 206.11743 | 485.4     | 1.06     |
| 232.13357 | 292.5     | 0.64     |
| 243.14936 | 2279.7    | 4.99     |
| 259.14427 | 321.0     | 0.70     |
| 271.14426 | 10861.6   | 23.75    |
| 303.17034 | 1104.7    | 2.42     |
| 331.16535 | 45726.0   | 100.00   |
| 390.23877 | 4967.2    | 10.86    |

**Table S8.** Spectrum list of MS<sup>2</sup> of D,D-TMAP-L-Phe-OMe.

FTMS + c ESI Full ms2 390.24@cid28.00 [105.00-400.00]

Scan #: 500-523

RT: 1.98-2.08

AV: 24

| m/z       | Intensity | Relative |
|-----------|-----------|----------|
| 124.07600 | 577.3     | 0.96     |
| 142.08657 | 4296.1    | 7.17     |
| 152.07107 | 540.9     | 0.90     |
| 168.08972 | 2505.3    | 4.18     |
| 206.11806 | 394.6     | 0.66     |
| 232.13390 | 662.1     | 1.11     |
| 243.14962 | 2857.4    | 4.77     |
| 259.14467 | 741.8     | 1.24     |
| 271.14468 | 15148.8   | 25.29    |
| 299.13955 | 817.1     | 1.36     |
| 303.17091 | 1296.1    | 2.16     |
| 331.16587 | 59895.0   | 100.00   |
| 390.23943 | 9307.6    | 15.54    |

**Table S9.** Spectrum list of MS<sup>2</sup> of x17299-L-Phe-OMe.

FTMS + c ESI Full ms2 390.24@cid28.00 [105.00-400.00]

Scan #: 442-462

RT: 1.74-1.82

AV: 21

| m/z       | Intensity | Relative |
|-----------|-----------|----------|
| 124.07558 | 166.0     | 0.63     |
| 142.08622 | 2102.2    | 8.00     |
| 152.07030 | 170.2     | 0.65     |
| 168.08914 | 768.8     | 2.93     |
| 206.11712 | 240.3     | 0.91     |
| 232.13340 | 197.2     | 0.75     |
| 243.14913 | 1296.6    | 4.93     |
| 259.14347 | 141.6     | 0.54     |
| 271.14399 | 6378.1    | 24.27    |
| 277.15486 | 157.8     | 0.60     |
| 303.16986 | 660.6     | 2.51     |
| 319.18594 | 523.0     | 1.99     |
| 331.16501 | 26278.2   | 100.00   |
| 390.23850 | 2336.8    | 8.89     |

**Table S10.** Spectrum list of MS<sup>2</sup> of synthetic L,L-TMAP-*d*<sub>9</sub>.

FTMS + c ESI Full ms2 238.21@cid31.00 [65.00-240.00]

Scan #: 345-394

RT: 1.36-1.47

AV: 50

| m/z       | Intensity  | Relative |
|-----------|------------|----------|
| 70.06495  | 1479674.6  | 9.23     |
| 114.05480 | 514823.2   | 3.21     |
| 114.09114 | 198927.7   | 1.24     |
| 124.07556 | 1363974.4  | 8.51     |
| 126.09122 | 468917.8   | 2.93     |
| 142.08615 | 16028258.0 | 100.00   |
| 170.08108 | 1176932.0  | 7.34     |
| 238.21092 | 296029.2   | 1.85     |

**Table S11.** Spectrum list of MS<sup>2</sup> of L,L-TMAP-*d*<sub>9</sub>-L-Phe-OMe.

FTMS + c ESI Full ms2 399.30@cid28.00 [105.00-400.00]

Scan #: 424-448

RT: 1.70-1.80

AV: 13

| m/z       | Intensity | Relative |
|-----------|-----------|----------|
| 124.07558 | 423.3     | 0.91     |
| 142.08637 | 4517.1    | 9.72     |
| 152.07072 | 279.2     | 0.60     |
| 168.08951 | 1722.6    | 3.71     |
| 206.11768 | 529.7     | 1.14     |
| 232.13337 | 207.5     | 0.45     |
| 243.14932 | 2729.3    | 5.87     |
| 259.14395 | 352.0     | 0.76     |
| 271.14417 | 11416.8   | 24.56    |
| 303.17033 | 1152.3    | 2.48     |
| 328.13257 | 417.7     | 0.90     |
| 331.16529 | 46483.5   | 100.00   |
| 399.29530 | 12117.9   | 26.07    |
